# Supplementary material for: qPrimerDB: a thermodynamics-based gene-specific qPCR primer database for 147 organisms
Source: PubMed Central journal article supplement — Nucleic Acids Res. 2017 Aug 21;46(Database issue):D1229–36. doi: 10.1093/nar/gkx725 (PMC5753361; doi:10.1093/nar/gkx725), 2017-08-21
Supplement: gkx725_supp.pdf [file gkx725_supp.pdf]

## **Supplementary Materials**

Supplementary Table S1. Statistics for gene-specific qPCR primers designed for 147 organisms.

Supplementary Table S2. Primer pairs for 66 genes used for qPCR validation.

Supplementary Table S3. Primer pairs collected from previously published literatures.

Supplementary Table S4. Comparison of specificity and classification of primer pairs collected from literatures and qPrimerDB.

Supplementary Table S5. Comparison of primer pairs derived from MRPrimer and qPrimerDB.

Supplementary Figure S1. qPCR validation of 66 randomly selected genes derived from 6 organisms. The maximal relative fluorescence units (RFU) are 7000 (A) and 13000 (C) on the y-axis of amplification curves of the 66 genes. The maximal relative changes in RFU over time are 1200 (C) and 2500 (D) on the y-axis of melting curves of the 66 genes.

Supplementary Figure S2. Screenshots of search and BLAST tools in qPrimerDB. (A) Search input interface. The interface provides an organism selection checklist and keyword input interface. After selecting single or multiple organisms, users can input three types of keywords, as shown in the examples. (B) Search results are displayed in table format. From this interface, users can click the boxes next to the genes of interest and export detailed information about the primers as XLS or JSON files. (C) BLAST analysis interface. This interface is designed to search the database using query sequences in FASTA format against the coding/mRNA sequences of the target organism(s). (D) BLAST results web interface. If the BLAST results are listed in table format, detailed information about the target primer can be displayed via the hyperlink in the Subject column.

**Supplementary Table S1. Statistics for gene-specific qPCR primers designed for 147 organisms.**

| Organism                                  | Source    | Assembly       | Database version | Genome size (Mb) | Gene number | Best primer (level1) | Best primer (level2) | Best primer (level3) | Sum of best primers | Percentage of best primers | All primer (level1) | All primer (level2) | All primer (level3) | Sum of all primers | Average primer pairs |
|-------------------------------------------|-----------|----------------|------------------|------------------|-------------|----------------------|----------------------|----------------------|---------------------|----------------------------|---------------------|---------------------|---------------------|--------------------|----------------------|
| <i>Apis mellifera</i>                     | Ensembl   | Amel_4.5       | 88.45            | 229.1            | 15320       | 9407                 | 3340                 | 127                  | 12874               | 84.03%                     | 65485               | 294355              | 26228               | 386068             | 25.20                |
| <i>Arabidopsis halleri</i>                | Phytozome | v1.1           | 12.0             | 121              | 25008       | 15538                | 9108                 | 95                   | 24741               | 98.93%                     | 57223               | 455371              | 39502               | 552096             | 22.08                |
| <i>Arabidopsis thaliana</i>               | TAIR      | TAIR10         | 87.11            | 135.7            | 27416       | 15830                | 9995                 | 170                  | 25995               | 94.82%                     | 58455               | 423831              | 38667               | 520953             | 19.00                |
| <i>Beta vulgaris</i> ssp. <i>vulgaris</i> | Ensembl   | RefBeet-1.2.2  | 87.2             | 517.4            | 26521       | 9849                 | 11107                | 77                   | 21033               | 79.31%                     | 18966               | 349734              | 46870               | 415570             | 15.67                |
| <i>Boechera stricta</i>                   | Phytozome | v1.2           | 12.0             | 196.5            | 27416       | 15768                | 11065                | 168                  | 27001               | 98.49%                     | 31688               | 314284              | 33562               | 379534             | 13.84                |
| <i>Bombyx mori</i>                        | Ensembl   | ASM15162v1     | 87.1             | 431.7            | 14623       | 11698                | 2043                 | 108                  | 13849               | 94.71%                     | 59017               | 102483              | 8615                | 170115             | 11.63                |
| <i>Bos taurus</i>                         | Ensembl   | UMD3.1         | 88.31            | 2649.7           | 20791       | 12629                | 7192                 | 149                  | 19970               | 96.05%                     | 30387               | 306893              | 69948               | 407228             | 19.59                |
| <i>Brachypodium distachyon</i>            | Ensembl   | v1.0           | 87.12            | 271.9            | 26552       | 17472                | 8179                 | 105                  | 25756               | 97.00%                     | 39554               | 295413              | 55501               | 390468             | 14.71                |
| <i>Brachypodium stacei</i>                | Phytozome | v1.1           | 12.0             | 234              | 29898       | 17418                | 11459                | 350                  | 29227               | 97.76%                     | 35780               | 365422              | 79488               | 480690             | 16.08                |
| <i>Brassica napus</i>                     | Ensembl   | AST_PRJEB504   | 12.0             | 738.4            | 101040      | 12679                | 70935                | 2959                 | 86573               | 85.68%                     | 14941               | 485323              | 129309              | 629573             | 6.23                 |
| <i>Caenorhabditis briggsae</i>            | Ensembl   | CB4            | 87.25            | 108.4            | 21996       | 12157                | 7303                 | 201                  | 19661               | 89.38%                     | 30430               | 183965              | 16745               | 231140             | 10.51                |
| <i>Callithrix jacchus</i>                 | Ensembl   | C_jacchus3.2.1 | 88.321           | 2759.2           | 23323       | 12050                | 9407                 | 323                  | 21780               | 93.38%                     | 26776               | 301349              | 61798               | 389923             | 16.72                |
| <i>Canis lupus familiaris</i>             | Ensembl   | CanFam3.1      | 88.31            | 2392.7           | 20806       | 10300                | 8965                 | 331                  | 19596               | 94.18%                     | 22182               | 379471              | 91133               | 492786             | 23.68                |
| <i>Capsella grandiflora</i>               | Phytozome | v1.1           | 12.0             | 100.5            | 24805       | 15507                | 9022                 | 106                  | 24635               | 99.31%                     | 33117               | 290202              | 28034               | 351353             | 14.16                |
| <i>Capsella rubella</i>                   | Phytozome | v1.0           | 12.0             | 134.8            | 26521       | 14722                | 10818                | 177                  | 25717               | 96.97%                     | 28789               | 307765              | 33028               | 369582             | 13.94                |
| <i>Carica papaya</i>                      | Phytozome | ASGPBv0.4      | 12.0             | 135              | 27769       | 15469                | 8957                 | 357                  | 24783               | 89.25%                     | 38727               | 166584              | 12310               | 217621             | 7.84                 |
| <i>Cavia porcellus</i>                    | Ensembl   | cavPor3        | 88.3             | 2663.4           | 19065       | 12531                | 5814                 | 194                  | 18539               | 97.24%                     | 35501               | 215727              | 41890               | 293118             | 15.37                |
| <i>Chenopodium quinoa</i>                 | Phytozome | v1.0           | 12.0             | 1385             | 44776       | 14261                | 26803                | 602                  | 41666               | 93.05%                     | 20465               | 333661              | 57716               | 411842             | 9.20                 |
| <i>Chlamydomonas reinhardtii</i>          | Ensembl   | v3.1           | 87.1             | 120.4            | 14431       | 12528                | 995                  | 185                  | 13708               | 94.99%                     | 80320               | 84681               | 40302               | 205303             | 14.23                |
| <i>Chlorocebus sabaeus</i>                | Ensembl   | ChlSab1.1      | 88.1             | 2762.7           | 19740       | 10289                | 8775                 | 191                  | 19255               | 97.54%                     | 21105               | 396919              | 95744               | 513768             | 26.03                |
| <i>Choloepus hoffmanni</i>                | Ensembl   | choHof1        | 88.1             | 2060.4           | 14030       | 10565                | 2723                 | 105                  | 13393               | 95.46%                     | 42045               | 131349              | 14309               | 187703             | 13.38                |
| <i>Cicer arietinum</i>                    | LIS       |                |                  |                  | 28269       | 14322                | 10002                | 356                  | 24680               | 87.30%                     | 32811               | 214764              | 17401               | 264976             | 9.37                 |
| <i>Ciona intestinalis</i>                 | Ensembl   | KH             | 88.3             | 112.2            | 16698       | 13266                | 2930                 | 45                   | 16241               | 97.26%                     | 43320               | 137851              | 8413                | 189584             | 11.35                |
| <i>Ciona savignyi</i>                     | Ensembl   | CSAV 2.0       | 88.2             | 177              | 11832       | 9981                 | 1274                 | 40                   | 11295               | 95.46%                     | 44072               | 85821               | 4997                | 134890             | 11.40                |
| <i>Citrus clementina</i>                  | Phytozome | v1.0           | 12.0             | 301.4            | 24533       | 14796                | 8946                 | 144                  | 23886               | 97.36%                     | 31306               | 292844              | 30475               | 354625             | 14.46                |
| <i>Citrus sinensis</i>                    | Phytozome | v1.1           | 12.0             | 319              | 25379       | 15144                | 9574                 | 186                  | 24904               | 98.13%                     | 32537               | 272943              | 25844               | 331324             | 13.06                |
| <i>Cucumis melo</i>                       | PLAZA     | 3.0            |                  |                  | 28812       | 15264                | 8856                 | 438                  | 24558               | 85.24%                     | 37839               | 179555              | 13346               | 230740             | 8.01                 |
| <i>Cucumis sativus</i>                    | Phytozome | v1.0           | 12.0             | 203              | 21503       | 14096                | 6721                 | 92                   | 20909               | 97.24%                     | 33502               | 254571              | 21985               | 310058             | 14.42                |
| <i>Cyanidioschyzon merolae</i>            | Ensembl   | ASM9120v1      | 87.1             | 16.7             | 5042        | 4686                 | 122                  | 18                   | 4826                | 95.72%                     | 46052               | 24333               | 4652                | 75037              | 14.88                |
| <i>Danaus plexippus</i>                   | Ensembl   | DanPle_1.0     | 87.1             | 272.9            | 16317       | 12274                | 2976                 | 166                  | 15416               | 94.48%                     | 54996               | 122903              | 10480               | 188379             | 11.54                |
| <i>Danio rerio</i>                        | Ensembl   | GRCz10         | 88.1             | 1464.4           | 26190       | 10638                | 14152                | 262                  | 25052               | 95.65%                     | 18638               | 437888              | 102715              | 559241             | 21.35                |
| <i>Dasytus novemcinctus</i>               | Ensembl   | Dasnov3.0      | 88.3             |                  | 24211       | 10855                | 11827                | 429                  | 23111               | 95.46%                     | 22247               | 388558              | 94645               | 505450             | 20.88                |
| <i>Daucus carota</i>                      | Phytozome | v2.0           | 12.0             | 421              | 32113       | 16346                | 12997                | 301                  | 29644               | 92.31%                     | 33827               | 274856              | 26529               | 335212             | 10.44                |
| <i>Dipodomys ordii</i>                    | Ensembl   | dipOrd1        | 88.1             | 1845             | 16808       | 12377                | 3832                 | 136                  | 16345               | 97.25%                     | 42068               | 186725              | 31415               | 260208             | 15.48                |
| <i>Drosophila ananassae</i>               | Ensembl   | dana_caf1      | 87.1             | 213.9            | 15234       | 12136                | 2107                 | 178                  | 14421               | 94.66%                     | 61232               | 133104              | 25384               | 219720             | 14.42                |
| <i>Drosophila erecta</i>                  | Ensembl   | dere_caf1      | 87.1             | 145.1            | 15046       | 11895                | 2192                 | 170                  | 14257               | 94.76%                     | 61276               | 132871              | 24278               | 218425             | 14.52                |

|                                    |           |                   |        |        |       |       |       |     |       |        |       |        |        |        |       |
|------------------------------------|-----------|-------------------|--------|--------|-------|-------|-------|-----|-------|--------|-------|--------|--------|--------|-------|
| <i>Drosophila grimshawi</i>        | Ensembl   | dgri_caf1         | 87.1   | 186.1  | 14983 | 11052 | 2416  | 239 | 13707 | 91.48% | 49704 | 124692 | 27318  | 201714 | 13.46 |
| <i>Drosophila melanogaster</i>     | Ensembl   | BDGP6             | 88.6   | 142.6  | 14175 | 11459 | 2065  | 46  | 13570 | 95.73% | 50178 | 214375 | 34696  | 299249 | 21.11 |
| <i>Drosophila mojavensis</i>       | Ensembl   | dmoj_caf1         | 87.1   | 180.2  | 14597 | 11737 | 1971  | 199 | 13907 | 95.27% | 58027 | 125475 | 26949  | 210451 | 14.42 |
| <i>Echinops telfairi</i>           | Ensembl   | TENREC            | 88.1   | 2111.6 | 20399 | 14191 | 4841  | 273 | 19305 | 94.64% | 51303 | 171450 | 29300  | 252053 | 12.36 |
| <i>Equus caballus</i>              | Ensembl   | EquCab2.0         | 88.2   | 2428.8 | 24849 | 12979 | 9149  | 509 | 22637 | 91.10% | 32765 | 261381 | 51208  | 345354 | 13.90 |
| <i>Erinaceus europaeus</i>         | Ensembl   | eriEur1           | 88.1   | 2133.1 | 15992 | 11755 | 3416  | 145 | 15316 | 95.77% | 43418 | 157832 | 23720  | 224970 | 14.07 |
| <i>Eucalyptus grandis</i>          | Phytozome |                   | 12.0   | 691    | 36349 | 16947 | 17654 | 402 | 35003 | 96.30% | 29972 | 352847 | 57186  | 440005 | 12.11 |
| <i>Eutrema salsugineum</i>         | Phytozome |                   | 12.0   | 243.1  | 26351 | 15439 | 10141 | 163 | 25743 | 97.69% | 32277 | 284269 | 30712  | 347258 | 13.18 |
| <i>Felis catus</i>                 | Ensembl   | Felis_catus_6.2   | 88.62  | 2365.7 | 20035 | 11244 | 8133  | 213 | 19590 | 97.78% | 27059 | 336208 | 71297  | 434564 | 21.69 |
| <i>Fragaria vesca</i>              | Phytozome | v1.1              | 12.0   | 240    | 32831 | 15890 | 15444 | 455 | 31789 | 96.83% | 30997 | 284396 | 34980  | 350373 | 10.67 |
| <i>Gadus morhua</i>                | Ensembl   | gadMor1           | 88.1   | 608    | 20613 | 15811 | 3915  | 250 | 19976 | 96.91% | 58758 | 168007 | 53345  | 280110 | 13.59 |
| <i>Gallus gallus</i>               | Ensembl   | Gallus_gallus-5.0 | 88.5   | 1285.6 | 18389 | 10430 | 6067  | 230 | 16727 | 90.96% | 25013 | 269830 | 55208  | 350051 | 19.04 |
| <i>Gasterosteus aculeatus</i>      | Ensembl   | BROAD S1          | 88.1   | 446.6  | 20839 | 15540 | 4576  | 132 | 20248 | 97.16% | 49034 | 247983 | 57440  | 354457 | 17.01 |
| <i>Glycine max</i>                 | Ensembl   | V1.0              | 87.1   | 973.3  | 54174 | 14323 | 37418 | 555 | 52296 | 96.53% | 18715 | 545054 | 125411 | 689180 | 12.72 |
| <i>Gossypium raimondii</i>         | Phytozome | v2.1              | 12.0   | 761.4  | 37505 | 15988 | 20410 | 265 | 36663 | 97.75% | 25208 | 476630 | 68390  | 570228 | 15.20 |
| <i>Heliconius melpomene</i>        | Ensembl   | Hmel1             | 88.1   | 269.6  | 13637 | 10530 | 1808  | 35  | 12373 | 90.73% | 53168 | 176147 | 11947  | 241262 | 17.69 |
| <i>Homo sapiens</i>                | Ensembl   | GRCh38.p10        | 88.38  | 3555   | 22357 | 11260 | 6057  | 315 | 17632 | 78.87% | 54153 | 315861 | 55355  | 425369 | 19.03 |
| <i>Ictidomys tridecemlineatus</i>  | Ensembl   | spetri2           | 88.2   | 2311.1 | 19232 | 11324 | 7332  | 182 | 18838 | 97.95% | 27562 | 268805 | 53954  | 350321 | 18.22 |
| <i>Ixodes scapularis</i>           | Ensembl   | IscaW1            | 87.1   | 1388.5 | 20486 | 15125 | 3453  | 394 | 18972 | 92.61% | 64201 | 99695  | 18195  | 182091 | 8.89  |
| <i>Kalanchoe fedtschenkoi</i>      | Phytozome | v1.1              | 12.0   | 256    | 30964 | 15101 | 14979 | 237 | 30317 | 97.91% | 26721 | 388097 | 57589  | 472407 | 15.26 |
| <i>Kalanchoe laxiflora</i>         | Phytozome | v1.1              | 12.0   | 422    | 50461 | 10781 | 34886 | 0   | 45667 | 90.50% | 13948 | 277988 | 65099  | 357035 | 7.08  |
| <i>Latimeria chalumnae</i>         | Ensembl   | LatCha1           | 88.1   | 2183.6 | 19710 | 9899  | 9505  | 112 | 19516 | 99.02% | 18796 | 374130 | 69596  | 462522 | 23.47 |
| <i>Leersia perrieri</i>            | Ensembl   | Lperr_V1.4        | 87.14  | 266.7  | 29078 | 15543 | 11864 | 627 | 28034 | 96.41% | 33060 | 334107 | 63729  | 430896 | 14.82 |
| <i>Lepisosteus oculatus</i>        | Ensembl   | LepOcu1           | 88.1   | 869.4  | 18383 | 10136 | 7939  | 110 | 18185 | 98.92% | 21533 | 411851 | 92958  | 526342 | 28.63 |
| <i>Linum usitatissimum</i>         | Phytozome | v1.0              | 12.0   | 318.3  | 43471 | 17709 | 22841 | 0   | 40550 | 93.28% | 28729 | 263031 | 48870  | 340630 | 7.84  |
| <i>Lottia gigantea</i>             | Ensembl   | Lotgi1            | 87.1   | 298.9  | 23428 | 14472 | 5961  | 220 | 20653 | 88.16% | 43995 | 208689 | 10977  | 263661 | 11.25 |
| <i>Lotus japonicus</i>             | LIS       | v3.0              |        | 472    | 29750 | 13415 | 11534 | 401 | 25350 | 85.21% | 25653 | 171550 | 18004  | 215207 | 7.23  |
| <i>Loxodonta africana</i>          | Ensembl   | Loxaf3.0          | 88.3   | 3118.6 | 20601 | 13082 | 6773  | 247 | 20102 | 97.58% | 36067 | 220997 | 40382  | 297446 | 14.44 |
| <i>Macaca mulatta</i>              | Ensembl   | Mmul_8.0.1        | 88.801 | 3246.4 | 21385 | 9769  | 9751  | 0   | 19520 | 91.28% | 19462 | 408745 | 103302 | 531509 | 24.85 |
| <i>Manihot esculenta</i>           | Phytozome | v6.1              | 12.0   | 495.48 | 33033 | 14763 | 15969 | 0   | 30732 | 93.03% | 25084 | 390253 | 55113  | 470450 | 14.24 |
| <i>Marchantia polymorpha</i>       | Phytozome | v3.1              | 12.0   | 225.8  | 19287 | 11995 | 6624  | 0   | 18619 | 96.54% | 27375 | 341568 | 55249  | 424192 | 21.99 |
| <i>Medicago truncatula</i>         | Ensembl   | MedtrA17_4.0      | 87.2   | 412.8  | 50633 | 16632 | 27592 | 0   | 44224 | 87.34% | 28184 | 455662 | 59918  | 543764 | 10.74 |
| <i>Megaselia scalaris</i>          | Ensembl   | Msca1             | 87.1   | 304.5  | 11482 | 8497  | 2183  | 0   | 10680 | 93.02% | 32869 | 42840  | 1469   | 77178  | 6.72  |
| <i>Meleagris gallopavo</i>         | Ensembl   | Turkey_2.01       | 88.21  | 935.9  | 14247 | 9744  | 4195  | 0   | 13939 | 97.84% | 26690 | 195393 | 29736  | 251819 | 17.68 |
| <i>Melitaea cinxia</i>             | Ensembl   | MelCinx1.0        | 87.1   | 361    | 16639 | 12676 | 3400  | 0   | 16076 | 96.62% | 51780 | 163965 | 9775   | 225520 | 13.55 |
| <i>Microcebus murinus</i>          | Ensembl   | Mmur_2.0          | 88.20  | 2378   | 18311 | 10241 | 7107  | 0   | 17348 | 94.74% | 23629 | 354780 | 84861  | 463270 | 25.30 |
| <i>Micromonas sp. RCC299</i>       | Phytozome | v3.0              | 12.0   |        | 10103 | 9122  | 688   | 0   | 9810  | 97.10% | 54579 | 59786  | 24874  | 139239 | 13.78 |
| <i>Micromonas pusilla CCMP1545</i> | Phytozome | CCMP1545 v3.0     | 12.0   | 22     | 10660 | 8977  | 1106  | 0   | 10083 | 94.59% | 44829 | 49409  | 27578  | 121816 | 11.43 |
| <i>Mimulus guttatus</i>            | Phytozome | v2.0              | 12.0   | 312.7  | 28140 | 16442 | 10471 | 0   | 26913 | 95.64% | 35095 | 311068 | 39220  | 385383 | 13.70 |
| <i>Mnemiopsis leidyi</i>           | Ensembl   | MneLei_Aug2011    | 87.1   | 150.4  | 17261 | 11244 | 4570  | 0   | 15814 | 91.62% | 33076 | 214063 | 16096  | 263235 | 15.25 |
| <i>Monodelphis domestica</i>       | Ensembl   | monDom5           | 88.5   | 3501.7 | 22049 | 8730  | 11661 | 0   | 20391 | 92.48% | 15471 | 433538 | 99450  | 548459 | 24.87 |
| <i>Mus musculus</i>                | Ensembl   | GRCm38.p5         | 88.38  | 3482.4 | 22233 | 12938 | 6876  | 266 | 20080 | 90.32% | 58920 | 377031 | 66764  | 502715 | 22.61 |

|                                   |           |                  |        |        |       |       |       |      |       |        |       |        |        |        |       |
|-----------------------------------|-----------|------------------|--------|--------|-------|-------|-------|------|-------|--------|-------|--------|--------|--------|-------|
| <i>Musa acuminata</i>             | Ensembl   | MA1              | 87.1   | 390.6  | 36525 | 17453 | 13414 | 0    | 30867 | 84.51% | 33691 | 307032 | 46610  | 387333 | 10.60 |
| <i>Myotis lucifugus</i>           | Ensembl   | Myoluc2.0        | 88.2   | 1966.4 | 21441 | 12711 | 7207  | 0    | 19918 | 92.90% | 35548 | 216200 | 43642  | 295390 | 13.78 |
| <i>Nasonia vitripennis</i>        | Ensembl   | Nvit_2.1         | 88.2   | 239.6  | 19230 | 13310 | 4670  | 161  | 18141 | 94.34% | 44821 | 197402 | 23654  | 265877 | 13.83 |
| <i>Nomascus leucogenys</i>        | Ensembl   | Nleu1.0          | 88.1   | 2756.6 | 19767 | 10157 | 8993  | 0    | 19150 | 96.88% | 19726 | 415355 | 100124 | 535205 | 27.08 |
| <i>Octopus bimaculoides</i>       | Ensembl   | PRJNA270931      | 87.1   | 1984.3 | 33609 | 13690 | 14824 | 0    | 28514 | 84.84% | 28892 | 374850 | 47000  | 450742 | 13.41 |
| <i>Oreochromis niloticus</i>      | Ensembl   | Orenil1.0        | 88.1   | 815.7  | 21462 | 10303 | 10821 | 100  | 21224 | 98.89% | 19246 | 442809 | 109863 | 571918 | 26.65 |
| <i>Ornithorhynchus anatinus</i>   | Ensembl   | OANA5            | 88.1   | 1917.7 | 22245 | 12283 | 8375  | 0    | 20658 | 92.87% | 34663 | 259545 | 50956  | 345164 | 15.52 |
| <i>Oropetium thomaeum</i>         | Phytozome |                  | 12.0   | 250    | 28446 | 16377 | 8144  | 0    | 24521 | 86.20% | 46441 | 195950 | 30760  | 273151 | 9.60  |
| <i>Oryctolagus cuniculus</i>      | Ensembl   | OryCun2.0        | 88.2   | 2604   | 20294 | 10951 | 7899  | 0    | 18850 | 92.88% | 27175 | 338181 | 84147  | 449503 | 22.15 |
| <i>Oryza barthii</i>              | Ensembl   | O.barthii_v1     | 87.3   | 308.3  | 34575 | 16911 | 14579 | 1131 | 32621 | 94.35% | 36110 | 306590 | 60325  | 403025 | 11.66 |
| <i>Oryza brachyantha</i>          | Ensembl   | Oryza_brachyant  | 87.14  | 260.8  | 32038 | 16101 | 11886 | 906  | 28893 | 90.18% | 35766 | 275767 | 46436  | 357969 | 11.17 |
| <i>Oryza glaberrima</i>           | Ensembl   | AGI1.1           | 87.2   | 316.4  | 33164 | 17136 | 10678 | 779  | 28593 | 86.22% | 41655 | 207787 | 38725  | 288167 | 8.69  |
| <i>Oryza sativa Indica</i>        | Ensembl   | ASM465v1         | 88.2   | 411.7  | 40745 | 19587 | 16928 | 1333 | 37848 | 92.89% | 41665 | 277525 | 59239  | 378429 | 9.29  |
| <i>Oryza sativa Japonica</i>      | Ensembl   | ASM465v1         | 87.2   | 411.7  | 35679 | 17705 | 15443 | 525  | 33673 | 94.38% | 33203 | 330383 | 66723  | 430309 | 12.06 |
| <i>Ostreococcus lucimarinus</i>   | Ensembl   | ASM9206v1        | 87.1   | 13.2   | 7640  | 6402  | 514   | 0    | 6916  | 90.52% | 41872 | 33044  | 8843   | 83759  | 10.96 |
| <i>Otolemur garnettii</i>         | Ensembl   | OtoGar3          | 88.3   | 2359.2 | 20809 | 12733 | 7237  | 0    | 19970 | 95.97% | 32719 | 252789 | 48395  | 333903 | 16.05 |
| <i>Ovis aries</i>                 | Ensembl   | Oar_v3.1         | 88.31  | 2534.3 | 21211 | 11594 | 8385  | 0    | 19979 | 94.19% | 27763 | 306699 | 68970  | 403432 | 19.02 |
| <i>Pan troglodytes</i>            | Ensembl   | CHIMP2.1.4       | 88.214 | 2995.9 | 19331 | 10467 | 8158  | 140  | 18765 | 97.07% | 21580 | 383034 | 87744  | 492358 | 25.47 |
| <i>Panicum hallii</i>             | Phytozome | v2.0             | 12.0   | 554    | 37232 | 17605 | 16946 | 620  | 35171 | 94.46% | 32316 | 415703 | 100124 | 548143 | 14.72 |
| <i>Papio anubis</i>               | Ensembl   | PapAnu2.0        | 88.2   | 2893.3 | 19930 | 10955 | 8151  | 205  | 19311 | 96.89% | 25042 | 336992 | 79630  | 441664 | 22.16 |
| <i>Pediculus humanus</i>          | Ensembl   | PhumU2           | 87.2   | 108.4  | 10787 | 8770  | 1623  | 36   | 10429 | 96.68% | 42753 | 112811 | 7474   | 163038 | 15.11 |
| <i>Pelodiscus sinensis</i>        | Ensembl   | PeISin_1.0       | 88.1   | 2106.6 | 18286 | 8734  | 8714  | 169  | 17617 | 96.34% | 16466 | 364094 | 77950  | 458510 | 25.07 |
| <i>Petromyzon marinus</i>         | Ensembl   | Pmarinus_7.0     | 88.7   | 647.4  | 10462 | 8865  | 878   | 96   | 9839  | 94.05% | 52663 | 56149  | 12197  | 121009 | 11.57 |
| <i>Phaseolus vulgaris</i>         | Phytozome | v2.1             | 12.0   | 537.2  | 27197 | 14061 | 12519 | 142  | 26722 | 98.25% | 26181 | 357888 | 45705  | 429774 | 15.80 |
| <i>Physcomitrella patens</i>      | Ensembl   | ASM242v1         | 87.11  | 480    | 32273 | 16269 | 11841 | 479  | 28589 | 88.58% | 36528 | 329491 | 41199  | 407218 | 12.62 |
| <i>Poecilia formosa</i>           | Ensembl   | Poecilia_formosa | 88.512 | 714.2  | 23675 | 10016 | 12726 | 204  | 22946 | 96.92% | 17277 | 497083 | 140537 | 654897 | 27.66 |
| <i>Pongo abelii</i>               | Ensembl   | PPYG2            | 88.1   | 3109.3 | 21447 | 10394 | 9527  | 290  | 20211 | 94.24% | 21016 | 388152 | 94056  | 503224 | 23.46 |
| <i>Populus deltoides</i>          | Phytozome | WV94 v2.1        | 12.0   | 446.8  | 44853 | 14290 | 23639 | 801  | 38730 | 86.35% | 21962 | 409962 | 66749  | 498673 | 11.12 |
| <i>Populus trichocarpa</i>        | Ensembl   | JGI2.0           | 87.2   | 417.1  | 41377 | 16294 | 22762 | 550  | 39606 | 95.72% | 25739 | 387039 | 58071  | 470849 | 11.38 |
| <i>Procapra capensis</i>          | Ensembl   | proCap1          | 88.1   | 2407.9 | 17177 | 13043 | 3639  | 126  | 16808 | 97.85% | 45094 | 190713 | 32281  | 268088 | 15.61 |
| <i>Prunus persica</i>             | Ensembl   | Prupe1_0         | 89.1   | 224.6  | 28108 | 14626 | 11140 | 266  | 26032 | 92.61% | 30378 | 271538 | 30839  | 332755 | 11.84 |
| <i>Pteropus vampyrus</i>          | Ensembl   | pteVam1          | 88.1   | 1839.4 | 18023 | 12809 | 4625  | 142  | 17576 | 97.52% | 40358 | 213319 | 38507  | 292184 | 16.21 |
| <i>Rattus norvegicus</i>          | Ensembl   | Rnor_6.0         | 88.6   | 3042.3 | 23845 | 11525 | 9661  | 344  | 21530 | 90.29% | 24302 | 372254 | 85774  | 482330 | 20.23 |
| <i>Rhodnius prolixus</i>          | Ensembl   | RproC1           | 87.1   | 561.5  | 16506 | 11334 | 2407  | 72   | 13813 | 83.68% | 47478 | 104595 | 4514   | 156587 | 9.49  |
| <i>Saccharomyces cerevisiae</i>   | Ensembl   | R64-1-1          | 88.4   | 12.2   | 6713  | 5425  | 491   | 17   | 5933  | 88.38% | 37460 | 43733  | 1090   | 82283  | 12.26 |
| <i>Salix purpurea</i>             | Phytozome | v1.0             | 12.0   | 392    | 37865 | 13530 | 19084 | 614  | 33228 | 87.75% | 21625 | 366834 | 56595  | 445054 | 11.75 |
| <i>Sarcophilus harrisii</i>       | Ensembl   | Devil_ref v7.0   | 88.7   | 2931.6 | 18966 | 10144 | 8383  | 153  | 18680 | 98.49% | 21312 | 321064 | 56273  | 398649 | 21.02 |
| <i>Sarcoptes scabiei</i>          | Ensembl   | SscaA1           | 87.1   | 56.3   | 10657 | 7882  | 2193  | 74   | 10149 | 95.23% | 31359 | 80596  | 5324   | 117279 | 11.00 |
| <i>Selaginella moellendorffii</i> | Ensembl   | v1.0             | 87.1   | 212.6  | 34865 | 12405 | 13887 | 1091 | 27383 | 78.54% | 22108 | 93772  | 22313  | 138193 | 3.96  |
| <i>Setaria italica</i>            | Ensembl   | JGIv2.0          | 87.21  | 405.7  | 35471 | 19718 | 14039 | 447  | 34204 | 96.43% | 40218 | 325029 | 67284  | 432531 | 12.19 |
| <i>Setaria viridis</i>            | Phytozome | v1.1             | 12.0   | 394.9  | 35214 | 17878 | 16103 | 426  | 34407 | 97.71% | 32605 | 435126 | 103427 | 571158 | 16.22 |
| <i>Sida fallax</i>                | Phytozome |                  | 12.0   |        | 26939 | 10874 | 15111 | 292  | 26277 | 97.54% | 17231 | 416858 | 96507  | 530596 | 19.70 |

|                                      |           |                 |        |        |                |                |                |              |                |               |                |                 |                |                 |              |
|--------------------------------------|-----------|-----------------|--------|--------|----------------|----------------|----------------|--------------|----------------|---------------|----------------|-----------------|----------------|-----------------|--------------|
| <i>Solanum lycopersicum</i>          | Ensembl   | SL2.50          | 87.250 | 737.6  | 33886          | 16016          | 14392          | 372          | 30780          | 90.83%        | 31284          | 308268          | 29330          | 368882          | 10.89        |
| <i>Solanum tuberosum</i>             | Ensembl   | SolTub_3.0      | 87.4   | 727.4  | 39353          | 17057          | 20080          | 491          | 37628          | 95.62%        | 30060          | 339655          | 36565          | 406280          | 10.32        |
| <i>Solenopsis invicta</i>            | Ensembl   | Si_gnG          | 87.1   | 354.7  | 14922          | 11010          | 3616           | 61           | 14687          | 98.43%        | 38114          | 245058          | 30416          | 313588          | 21.02        |
| <i>Sorghum bicolor</i>               | Ensembl   | Sorbi1          | 87.14  | 738.5  | 34496          | 18939          | 12381          | 651          | 31971          | 92.68%        | 40650          | 302510          | 62084          | 405244          | 11.75        |
| <i>Spirodela polyrhiza</i>           | Phytozome | v2              | 12.0   | 158    | 19623          | 13992          | 4600           | 342          | 18934          | 96.49%        | 48262          | 130900          | 24065          | 203227          | 10.36        |
| <i>Strongylocentrotus purpuratus</i> | Ensembl   | Spur_3.1        | 87.3   | 816    | 40772          | 11644          | 14749          | 380          | 26773          | 65.67%        | 21494          | 324400          | 46931          | 392825          | 9.63         |
| <i>Strongyloides ratti</i>           | Ensembl   | S_ratti_ED321_v | 87.250 | 43.2   | 12449          | 9505           | 2133           | 44           | 11682          | 93.84%        | 35857          | 86419           | 4398           | 126674          | 10.18        |
| <i>Sus scrofa</i>                    | Ensembl   | Sscrofa10.2     | 88.102 | 3024.7 | 22198          | 11586          | 8347           | 299          | 20232          | 91.14%        | 27078          | 302217          | 67647          | 396942          | 17.88        |
| <i>Taeniopygia guttata</i>           | Ensembl   | taeGut3.2.4     | 88.1   | 1222.9 | 17894          | 9939           | 5299           | 0            | 15238          | 85.16%        | 27315          | 174054          | 29571          | 230940          | 12.91        |
| <i>Takifugu rubripes</i>             | Ensembl   | FUGU 4.0        | 88.4   | 393.3  | 18685          | 13519          | 4381           | 0            | 17900          | 95.80%        | 42955          | 218639          | 44874          | 306468          | 16.40        |
| <i>Carlito syrichta</i>              | Ensembl   | tarSyr1         | 88.1   | 2768.6 | 14865          | 10888          | 3271           | 0            | 14159          | 95.25%        | 38545          | 158433          | 19628          | 216606          | 14.57        |
| <i>Tetranychus urticae</i>           | Ensembl   | ASM23943v1      | 87.1   | 89.6   | 18020          | 11494          | 4153           | 0            | 15647          | 86.83%        | 37087          | 166861          | 10276          | 214224          | 11.89        |
| <i>Thellungiella parvula</i>         | PLAZA     | 3.0             | 3.0    |        | 25691          | 16021          | 9084           | 171          | 25276          | 98.38%        | 37789          | 232147          | 21643          | 291579          | 11.35        |
| <i>Tribolium castaneum</i>           | Ensembl   | Tcas5.2         | 88.5   | 152.4  | 16741          | 11830          | 3597           | 166          | 15593          | 93.14%        | 44210          | 148745          | 14911          | 207866          | 12.42        |
| <i>Triticum urartu</i>               | Ensembl   | ASM34745v1      | 87.1   | 3009   | 34977          | 18450          | 12405          | 755          | 31610          | 90.37%        | 43380          | 244927          | 40632          | 328939          | 9.40         |
| <i>Tupaia belangeri</i>              | Ensembl   | tupBel1         | 88.1   | 2137.2 | 17784          | 12631          | 3874           | 216          | 16721          | 94.02%        | 47153          | 161593          | 24112          | 232858          | 13.09        |
| <i>Tursiops truncatus</i>            | Ensembl   | turTru1         | 88.1   | 2298.5 | 17475          | 12552          | 4379           | 141          | 17072          | 97.69%        | 39719          | 208509          | 39356          | 287584          | 16.46        |
| <i>Vicugna pacos</i>                 | Ensembl   | vicPac1         | 88.1   | 1923   | 12663          | 9933           | 2256           | 0            | 12189          | 96.26%        | 40016          | 129073          | 14310          | 183399          | 14.48        |
| <i>Vigna angularis</i>               | LIS       | Va3.0           |        |        | 26857          | 14318          | 10509          | 275          | 25102          | 93.47%        | 31858          | 234398          | 21958          | 288214          | 10.73        |
| <i>Vigna radiata</i>                 | LIS       |                 |        |        | 22368          | 13506          | 8091           | 163          | 21760          | 97.28%        | 31935          | 214322          | 18557          | 264814          | 11.84        |
| <i>Vitis vinifera</i>                | Ensembl   | IGGP_12x        | 87.3   | 486.2  | 29971          | 14333          | 12751          | 359          | 27443          | 91.57%        | 27510          | 282367          | 34360          | 344237          | 11.49        |
| <i>Volvox carteri</i>                | Phytozome | v2.1            | 12.0   |        | 14247          | 12918          | 1056           | 65           | 14039          | 98.54%        | 79989          | 261557          | 87086          | 428632          | 30.09        |
| <i>Xenopus tropicalis</i>            | Ensembl   | JGI 4.2         | 88.42  | 1358.3 | 18615          | 10951          | 6973           | 84           | 18008          | 96.74%        | 24073          | 286554          | 40985          | 351612          | 18.89        |
| <i>Xiphophorus maculatus</i>         | Ensembl   | Xipmac4.4.2     | 88.1   | 652.8  | 20407          | 10523          | 9509           | 141          | 20173          | 98.85%        | 20667          | 424328          | 102997         | 547992          | 26.85        |
| <i>Zea mays</i>                      | Ensembl   | AGPv4           | 87.7   | 2104.4 | 63480          | 17914          | 31891          | 1562         | 51367          | 80.92%        | 28688          | 441858          | 110699         | 581245          | 9.16         |
| <i>Zootermopsis nevadensis</i>       | Ensembl   | ZooNev1.0       | 87.1   | 464.3  | 14610          | 9805           | 3393           | 0            | 13198          | 90.34%        | 34933          | 129663          | 10001          | 174597          | 11.95        |
| <i>Zostera marina</i>                | Phytozome | v2.2            | 12.0   |        | 20450          | 13576          | 5321           | 132          | 19029          | 93.05%        | 35968          | 215356          | 16615          | 267939          | 13.10        |
| <b>Total</b>                         |           |                 |        |        | <b>3598514</b> | <b>1899842</b> | <b>1397989</b> | <b>36864</b> | <b>3334695</b> | <b>93.44%</b> | <b>5212329</b> | <b>39038395</b> | <b>6841061</b> | <b>51091785</b> | <b>15.09</b> |

**Supplementary Table S2. Primer pairs for 66 genes used for qPCR validation.**

| primer ID           | Gene ID           | Primer level | Forward primer sequence (5'-3') | Reverse primer sequence (5'-3') | Primer pair coverage | Amplicon size | Amplicon GC content | Tm of forward primer | Tm of reverse primer | ΔG of forward primer | ΔG of reverse primer | Number of exons spanned |
|---------------------|-------------------|--------------|---------------------------------|---------------------------------|----------------------|---------------|---------------------|----------------------|----------------------|----------------------|----------------------|-------------------------|
| A.thaliana.000923v1 | AT1G10000         | I1           | CATGATTTTCTCTGCTACGTGG          | TTTGAGTCCGATAACACAAGGA          | 100                  | 230           | 53.91               | 58.05                | 57.98                | -22.16               | -21.8                | 1                       |
| A.thaliana.001937v1 | AT1G20000         | I2           | CCAAAAACATAACTGGTGTCTGA         | CAACGATGTTCATAGTGTCTGC          | 100                  | 192           | 40.62               | 58                   | 58.08                | -21.92               | -22.35               | 1                       |
| A.thaliana.003823v1 | AT1G50000         | I2           | ATCCAGCGGACTATTAATCGTT          | GAGTCAGACCACATCACTAGAG          | 100                  | 165           | 52.73               | 57.99                | 57.95                | -21.84               | -21.96               | 2                       |
| A.thaliana.007887v1 | AT2G20000         | I1           | ATTCTATAATACGCCTTCGCCA          | GGACTTTGGAGAAGTGTCTAGTA         | 100                  | 127           | 48.03               | 58.06                | 57.99                | -21.9                | -21.84               | 2                       |
| A.thaliana.009930v1 | AT2G40000         | I1           | TAACGAGATGAGTCGGTGTAAG          | CGTATGGATTATCCTTGAGGCT          | 100                  | 128           | 48.44               | 57.97                | 58.05                | -22.04               | -21.84               | 1                       |
| A.thaliana.011674v1 | AT3G10000         | I1           | AAAACCATCCACAGTACGGTAT          | TGTATTCACGTGGCAATAAAC           | 100                  | 145           | 46.21               | 58.03                | 57.89                | -21.76               | -21.96               | 1                       |
| A.thaliana.012747v1 | AT3G20000         | I1           | GACAATTTTGAGGGTTTACGCT          | ATTGGCACAAACTCATAATGG           | 100                  | 156           | 43.59               | 58.08                | 57.85                | -22.04               | -21.74               | 2                       |
| A.thaliana.014538v1 | AT3G50000         | I1           | TTACTGGTATCAGGTTTCGATCG         | GGTATAAACACGAGCTTTCGAC          | 100                  | 92            | 47.83               | 58.02                | 58.07                | -22                  | -22.3                | 1                       |
| A.thaliana.017769v1 | AT4G20000         | I1           | AGTGGTTACAACACTATGAGCA          | AATTGCTAGGGTTTGCCTTTAG          | 100                  | 192           | 50                  | 57.98                | 58.15                | -21.77               | -22.07               | 1                       |
| A.thaliana.018814v1 | AT4G30000         | I1           | CTTCAACTCTGAGGTTGCTTC           | CTTGCAGACATCATCATACTGC          | 100                  | 197           | 42.64               | 58.1                 | 58.11                | -22.12               | -22.17               | 1                       |
| A.thaliana.019845v1 | AT4G40000         | I1           | CACCTGGAATGAAGGTATCGTA          | AAGAAAACAACAGGGTAAAGGC          | 100                  | 114           | 41.23               | 57.92                | 57.92                | -21.81               | -21.81               | 1                       |
| A.thaliana.021722v1 | AT5G20000         | I2           | CTTGACCAGCAAATCAAGGAAA          | TGCCATCACAAAAGTTCTCTG           | 100                  | 255           | 45.88               | 58                   | 58.01                | -21.89               | -21.96               | 3                       |
| A.thaliana.022983v1 | AT5G40000         | I1           | AAGTCAGAGACGAGTACAAAGG          | CCAAAAACCCATTGCGTACTTA          | 100                  | 217           | 38.25               | 58.08                | 58.08                | -22                  | -22                  | 1                       |
| A.thaliana.024045v1 | AT5G50000         | I2           | TGTTACCGAGATGTAAAGACA           | CGCATTTTCGATTATACGGGTT          | 100                  | 182           | 44.51               | 57.99                | 58.11                | -21.87               | -22.2                | 2                       |
| A.thaliana.025938v1 | ATMG00400         | I2           | GCGCAGAAGTATTCTTTCACAA          | ATTCTTCAGATGGATCGCTCTT          | 100                  | 142           | 44.37               | 58.17                | 57.91                | -22.21               | -21.73               | 1                       |
| B.napus.000092v1    | BnaA01g01000D     | I2           | GATGGGATCTGCCATTTCAATC          | GATCTCGCTGACGTGTAATAGA          | 100                  | 81            | 46.91               | 58.07                | 58.11                | -21.96               | -22.17               | 2                       |
| B.napus.001900v1    | BnaA01g21000D     | I2           | CTCTTGGAAGCTTGCTTTTGAT          | CGTAGCCAGAAAGAAGCTATCT          | 100                  | 132           | 40.15               | 58.07                | 58.27                | -21.96               | -22.09               | 1                       |
| B.napus.002743v1    | BnaA01g31000D     | I1           | AGATTAGATCGCTGTTTCGTCAT         | GTAACGTGATGAATTGCTGGT           | 100                  | 293           | 50.51               | 58.01                | 58.16                | -21.95               | -22.14               | 2                       |
| B.napus.003374v1    | BnaA02g01000D     | I2           | GAAGCATCGATCAAACAGAGAC          | GATTGTGAATCACGATCTCTGC          | 100                  | 223           | 50.22               | 58.06                | 58.12                | -22.23               | -22.26               | 1                       |
| B.napus.004259v1    | BnaA02g11000D     | I2           | GGTCAAAGTTACTTTTCCGCTT          | GTAAGCTCAAAGCGTTGATAC           | 100                  | 95            | 48.42               | 58.02                | 58.08                | -22                  | -22.37               | 2                       |
| C.sinensis.001232v1 | orange1.1g003100m | I1           | CTGTAGTCAAAGCTAAAACCGG          | AAACGTGTACCTCCAACCTAGAG         | 100                  | 232           | 44.4                | 57.91                | 58.07                | -22.06               | -21.96               | 2                       |
| C.sinensis.004464v1 | orange1.1g011100m | I1           | CACAAATCCCGATCCTAACTCT          | CTCGAGAAATTTGGGTATGCAG          | 100                  | 151           | 60.26               | 58.18                | 58.03                | -21.92               | -22.09               | 1                       |
| C.sinensis.004896v1 | orange1.1g012100m | I1           | CAACATGGATTGTACGATGTCC          | TCACCTTCTGCCAAATAGATT           | 100                  | 94            | 42.55               | 58.04                | 58.01                | -22.12               | -21.64               | 2                       |
| C.sinensis.005651v1 | orange1.1g014100m | I1           | ATAAAGTATTTGCAACTCGGGC          | CTCAAATGTTCAAGCACCGTA           | 100                  | 167           | 43.71               | 57.95                | 58.1                 | -21.95               | -22.11               | 1                       |
| C.sinensis.012502v1 | orange1.1g032100m | I1           | AGAGCAAAAATAGGTACCCACA          | ACAACGTTAGACCTACTCTGTG          | 100                  | 103           | 42.72               | 57.95                | 58.08                | -21.64               | -22.03               | 1                       |
| C.sinensis.014071v1 | orange1.1g035100m | I1           | ATTCATATTCAGTGTGATGGGC          | TTAGATGATTTCTAGGGGCAC           | 100                  | 93            | 43.01               | 57.13                | 57.89                | -21.39               | -21.65               | 1                       |
| C.sinensis.015642v1 | orange1.1g037100m | I1           | GAAATGGTTTAACTCCGCGAT           | GTCACCTGTTTAAATCGCTCTG          | 100                  | 265           | 42.64               | 58.23                | 58.25                | -22.19               | -22.3                | 1                       |
| C.sinensis.018815v1 | orange1.1g041100m | I1           | CACTCTGAATCTATCGACACGA          | CTGACTCCTCCTTCATCTGTTT          | 100                  | 169           | 48.52               | 58.04                | 58.04                | -22.12               | -21.81               | 1                       |
| C.sinensis.021946v1 | orange1.1g045100m | I1           | CAAGCAATCCAATCAGCCAATA          | TTGAGAAGTTGCCGTAGAATCT          | 100                  | 102           | 42.16               | 57.93                | 58.05                | -21.84               | -21.87               | 1                       |
| C.sinensis.022738v1 | orange1.1g046100m | I1           | CTTTAGTCGCTCAGGGTCTAAA          | GAAAGCATCAAAAACAGGCAAC          | 100                  | 157           | 43.95               | 58.13                | 58.12                | -21.99               | -22.22               | 1                       |
| B.mori.000946v1     | BGIBMGA001000-RA  | I1           | ATATGATTGACGAAAGCGATGC          | TAAGTAGGTCGTATCCATTGG           | 100                  | 240           | 45.83               | 58.18                | 57.92                | -22.25               | -21.81               | 1                       |
| B.mori.001902v1     | BGIBMGA002000-RA  | I1           | ATGTTCGAACTTCATTAGCCG           | CGGATAGGTCCTTGTCTGATAC          | 100                  | 234           | 40.17               | 57.98                | 58.16                | -22.09               | -22.15               | 1                       |
| B.mori.002847v1     | BGIBMGA003000-RA  | I1           | ACAACACGTGACTCAGTTAGA           | ATTGTTGATAGTTGATGCGACG          | 100                  | 188           | 37.77               | 58.2                 | 58.05                | -22.05               | -22.19               | 1                       |
| B.mori.003797v1     | BGIBMGA004000-RA  | I1           | ACTAATTGGCAACTTCGGTCTA          | GCAAAGGAACCGTCATAAAGTT          | 100                  | 264           | 42.05               | 58.05                | 58.08                | -21.83               | -22.04               | 2                       |
| B.mori.006642v1     | BGIBMGA007000-RA  | I1           | TGATAATGCTGAACCTAGCACA          | AACAGCTTTATCGTACGTTTCG          | 100                  | 256           | 59.77               | 58.11                | 58.01                | -21.84               | -22.28               | 2                       |
| B.mori.008553v1     | BGIBMGA009000-RA  | I1           | CGGTTGAAATATGGAAGGTCTG          | ATTATAGTGCCTGTCGGTAGC           | 100                  | 185           | 56.76               | 58.3                 | 58.6                 | -22.29               | -22.31               | 1                       |
| B.mori.009505v1     | BGIBMGA010000-RA  | I1           | CATGAAAGCTGAGCGTTACAAC          | AGTAGTAGACTGCGTTTCTTGG          | 100                  | 83            | 49.4                | 59.09                | 58.41                | -22.85               | -22.2                | 1                       |
| B.mori.012352v1     | BGIBMGA013000-RA  | I1           | GTGAAAAATCTGAGCGACGTAA          | CGTGCGGTACTAATTCTAATGC          | 100                  | 95            | 41.05               | 57.93                | 58.2                 | -22.16               | -22.37               | 1                       |

|                   |                      |    |                          |                         |      |     |       |       |       |        |        |   |
|-------------------|----------------------|----|--------------------------|-------------------------|------|-----|-------|-------|-------|--------|--------|---|
| B.mori.013300v1   | BGIBMGA014000-RA     | l1 | CTCAACTATTCAACTTACGCCG   | CGAAGCTAGCCATTAACAGTC   | 100  | 219 | 48.86 | 58.07 | 58.05 | -22.28 | -22.18 | 2 |
| O.sativa.000001v1 | OS01T0100100-01      | l1 | AGAAATGGTGAAATGCGTGTAG   | ATGTCTTGCCCAAATAGTAGCT  | 100  | 99  | 44.44 | 57.89 | 58.09 | -21.97 | -21.73 | 1 |
| O.sativa.003516v1 | OS01T0810000-02      | l1 | CGTCCTATAGGGAGTTAGAGGA   | AATCTCATCCTCACGGAGTTTT  | 100  | 128 | 45.31 | 57.96 | 58.04 | -21.69 | -21.77 | 2 |
| O.sativa.004796v1 | OS02T0110000-01      | l1 | AGATTTGTCTTTGTTGGAGTGC   | GATTCTTTAGAAAGACGCACCAC | 100  | 154 | 43.51 | 58.01 | 57.99 | -21.96 | -22.15 | 1 |
| O.sativa.006390v1 | OS02T0510000-01      | l1 | TTTAAGCTTATCTCGGAGGCTT   | CAAGTACTCATACTGCATCCGA  | 100  | 276 | 48.91 | 57.84 | 58.28 | -21.68 | -22.12 | 1 |
| O.sativa.009315v1 | OS03T0210000-00      | l1 | GAATCCTGGAAGACGATCGAC    | CTGGAACCTGAGGTACTTGG    | 96.6 | 210 | 67.62 | 58.84 | 57.81 | -22.1  | -20.84 | 1 |
| O.sativa.010010v1 | OS03T0310000-01      | l1 | ACATCATCGCCAACTACAAGTC   | TTATCGGTATCAGCTCGTGATC  | 100  | 260 | 65    | 59.32 | 58.16 | -22.71 | -22.13 | 2 |
| O.sativa.011464v1 | OS03T0710000-02      | l1 | GGATCAATGCCAAGATCGTG     | CACGTTCTGTACCTCGAAG     | 100  | 257 | 65.37 | 57.52 | 58.59 | -20.93 | -21.54 | 2 |
| O.sativa.014856v1 | OS04T0610000-02      | l1 | TTTTGCATGTAACACTACGTTCCG | TTGAGACAGAGTGTAAGACCAC  | 100  | 210 | 46.19 | 58.18 | 58    | -22.26 | -21.91 | 2 |
| O.sativa.018284v1 | OS06T0110000-01      | l1 | CATTTTCTCCTGGGTTACAAGC   | AGCGAGCATATCAAGACGAATA  | 100  | 278 | 44.24 | 58.14 | 58.08 | -22.04 | -22.01 | 2 |
| O.sativa.020188v1 | OS06T0610000-01      | l1 | ATCGATCGAAAGTTGAAAGCTG   | CATGTTGAACCTGGCGTAG     | 89.7 | 259 | 63.71 | 57.98 | 56.89 | -22.13 | -20.22 | 1 |
| O.sativa.021035v1 | OS07T0110000-02      | l1 | ATAGTTAATGTGGCTGCGGATA   | AAATGCAACATCCTTAGCACAG  | 100  | 80  | 46.25 | 57.98 | 58.14 | -21.77 | -22.02 | 1 |
| O.sativa.021605v1 | OS07T0210000-02      | l1 | CAAGAGCATAAGATCAGCACAC   | TGAGGAAGGAAGAAGATGTGAC  | 100  | 211 | 47.87 | 58.04 | 58.05 | -22.14 | -21.84 | 4 |
| O.sativa.023633v1 | OS08T0110000-02      | l1 | GCCCTTAATCGACTACCTCAAT   | CCATCTTTTACCATTGTAGCGG  | 100  | 156 | 41.03 | 58.25 | 58.03 | -21.98 | -22.05 | 2 |
| O.sativa.027250v1 | OS09T0510000-01      | l1 | TCTGTGATTGATGGACAGTACG   | CGGGGCATATACAGATAACAGA  | 100  | 81  | 39.51 | 58.47 | 57.79 | -22.24 | -21.73 | 1 |
| O.sativa.030244v1 | OS11T0210000-01      | l1 | AAACCTTGGAGATAAAAACGGC   | GTGTCCACCAATAGTAAGAGCT  | 100  | 84  | 36.9  | 58.07 | 58.12 | -21.97 | -21.89 | 1 |
| O.sativa.031809v1 | OS12T0110000-00      | l1 | TGTCTCTATCCTTGTATGGGA    | CGCACGTCAAATATCCTAACAG  | 100  | 157 | 46.5  | 58.06 | 58.13 | -21.55 | -22.31 | 2 |
| O.sativa.032377v1 | OS12T0210000-01      | l1 | GCAGAAGAAAACAACCACAAAC   | AAACACAGGTGATGCTTAAACC  | 100  | 85  | 34.12 | 57.73 | 58    | -22.02 | -21.91 | 1 |
| D.rerio.000382v1  | ENSDART0000006300.6  | l1 | AGTTGCTGACTTGGTTGAGATA   | GGAACATGACTACCAGGTAGAG  | 100  | 195 | 50.26 | 57.97 | 57.93 | -21.75 | -21.85 | 2 |
| D.rerio.003649v1  | ENSDART0000053300.7  | l1 | CAAGAAAACATGGTCGCCATAA   | TTCTGATTCCTCTACTGACACG  | 100  | 204 | 52.94 | 58.15 | 57.88 | -22.07 | -21.89 | 1 |
| D.rerio.006794v1  | ENSDART0000087300.6  | l1 | CTCTGATGTACTTTACGGACGT   | GCAGTCTTTCGATCGGAATAAC  | 100  | 262 | 40.84 | 58.23 | 58.13 | -22.18 | -22.31 | 1 |
| D.rerio.007382v1  | ENSDART0000098300.3  | l1 | CACATGATGGCAACTACTTAGC   | GGAGCCACTGTATCTAAGCATA  | 100  | 128 | 48.44 | 58.03 | 57.72 | -22.09 | -21.67 | 1 |
| D.rerio.010261v1  | ENSDART00000124300.3 | l1 | AACTTTATACGCTCAAGTCGC    | CGTTTTAAAATCTGGACGCTGA  | 100  | 155 | 48.39 | 57.99 | 58.18 | -22.18 | -22.23 | 1 |
| D.rerio.011437v1  | ENSDART00000131300.1 | l1 | GACTCAAACAACAGCAAATGC    | CACAACTGTTTGACAATAGGGG  | 100  | 198 | 32.32 | 58.13 | 58.08 | -22.29 | -22.01 | 1 |
| D.rerio.012064v1  | ENSDART00000133300.1 | l1 | GAGAATGATGTAAGGGAGCGTA   | CTTTTGATTGAAGGACTTGCCA  | 100  | 96  | 47.92 | 58    | 58    | -21.91 | -21.89 | 1 |
| D.rerio.013009v1  | ENSDART00000136300.3 | l1 | ATCTGGGTCACGTTGAAACTAT   | GTAAACTACTCCCTCATTGCCT  | 100  | 155 | 43.23 | 58.04 | 58.11 | -21.8  | -21.82 | 1 |
| D.rerio.015231v1  | ENSDART00000143300.2 | l1 | GACTGCATATGATGACCAGGTA   | TCTTTTCTTTTGTGACCGG     | 100  | 122 | 39.34 | 57.98 | 58.3  | -21.82 | -22.25 | 1 |
| D.rerio.015585v1  | ENSDART00000144300.1 | l1 | AAGGGTGATAAGGGTAACACAG   | TTTGGTCTGGTTCTCCTATTC   | 100  | 218 | 55.05 | 58.03 | 58.03 | -21.73 | -21.73 | 4 |

**Supplementary Table S3. Primer pairs collected from previously published literatures.**

| Organism             | Gene ID   | Forward primer (5'-3')    | Reverse primer (5'-3')    | Reference |
|----------------------|-----------|---------------------------|---------------------------|-----------|
| Arabidopsis thaliana | AT1G13300 | AGGACAACATCAGAGACATCACCG  | ATAAACCACCGACGACTACGA     | [1]       |
| Arabidopsis thaliana | AT1G21910 | TCTATCCATCCACAACAACAACAA  | TTACACGAAGACGAAGACGAGG    | [1]       |
| Arabidopsis thaliana | AT1G77640 | ATAAAGGTGTGAGGATGCGAAG    | GTGGTGATGTTAGGGAAGTTGAG   | [1]       |
| Arabidopsis thaliana | AT2G18370 | GCCATGTGTGAGCTACTTGACC    | ACTCTTAACTCCGTCGCAACAA    | [1]       |
| Arabidopsis thaliana | AT2G23780 | GGCTTCACCACCATTTCACATTC   | CCACCCATCAAACCAATACCG     | [1]       |
| Arabidopsis thaliana | AT5G13580 | TCTCTTGTGGCCCTCCCTTC      | CCTCCATCTAAACCCACACCC     | [1]       |
| Arabidopsis thaliana | AT5G25160 | AACGCACACAAGAGAGAGAGAAC   | GGAAAGGAAGTGGAGAGAAACC    | [1]       |
| Arabidopsis thaliana | AT5G43350 | ATGCTCTTCACCTTCCTTGTC     | CCAAACATCGCACTCCAAATAAC   | [1]       |
| Arabidopsis thaliana | AT1G61800 | GTTGTCTCTCGCTTGTTGTTT     | CGTGTCTATCGTGTGTGCTA      | [1]       |
| Arabidopsis thaliana | AT1G66390 | TGAAGCCAAGTATCAAGAGAGGA   | CGGTGTTGTAGGAGGGGAAA      | [1]       |
| Arabidopsis thaliana | AT3G14200 | TTGAACGAAATGGCGACTATGA    | TTTGAAGTGGAGCAGGACGA      | [1]       |
| Arabidopsis thaliana | AT3G26190 | GCTCGTCAAGAAAGTACAGAA     | CAATAGCCACCCAAGACC        | [1]       |
| Arabidopsis thaliana | AT4G25000 | ACGCTGGAATCACTCATCTTTG    | GCCTCTGAACCGTATTTGGA      | [1]       |
| Arabidopsis thaliana | AT4G33710 | TCGTCTATTCACTCAAACCTCAC   | GGCACATCCAACCCACTCT       | [1]       |
| Arabidopsis thaliana | AT2G40670 | CAGGAGGTTCTTGTTCGTCTTTA   | ATTCTCTGCTGTTGTCACTTTGC   | [1]       |
| Arabidopsis thaliana | AT3G13920 | CGTATCGGAAGAAGTGGAAAGG    | CAGAGCAAACACAGCAACAGA     | [1]       |
| Arabidopsis thaliana | AT3G62250 | GCTTCATCTCGTCCTCCGTCTC    | AACCTTCTTATGCTTGTGCTTG    | [1]       |
| Arabidopsis thaliana | AT3G57260 | CTTAGCCTCACCACCAATGTTG    | TCCCGTAGCATACTCCGATTTG    | [2]       |
| Arabidopsis thaliana | AT2G28390 | AACTCTATGCAGCATTTGATCCACT | TGATTGCATATCTTTATCGCCATC  | [3]       |
| Arabidopsis thaliana | AT1G18610 | CTCAGGTTGATGAAGCGTCT      | AAAACCCACCCTATCTCCAG      | [3]       |
| Arabidopsis thaliana | AT4G26410 | GAGCTGAAGTGGCTTCCATGAC    | GGTCCGACATACCCATGATCC     | [3]       |
| Arabidopsis thaliana | AT4G34270 | GTGAAAACCTGTTGGAGAGAAGCAA | TCAACTGGATAACCCTTTCGCA    | [3]       |
| Arabidopsis thaliana | AT1G13320 | TAACGTGGCCAAAATGATGC      | GTTCTCCACAACCGCTTGGT      | [3]       |
| Arabidopsis thaliana | AT1G56650 | TCTTCTTCTTCGCCTTCATAG     | ATCTTACAACACGGTTCATG      | [3]       |
| Arabidopsis thaliana | AT1G66370 | TCCGATGAAGTTGATCTTG       | TCATCGTGCTTCTTACTCAA      | [3]       |
| Arabidopsis thaliana | AT1G66380 | GTCAAGAACTACTGGAACACC     | ATATCGACTTTTTGGGCC        | [3]       |
| Arabidopsis thaliana | AT1G66390 | CAAGAGAGGAAGACTTAGCAA     | GATGGGTGTTCCAGTAATTT      | [3]       |
| Arabidopsis thaliana | AT5G42800 | AGGCCAAAATACCCCGAA        | TAAACCCCATGTCCGTCAG       | [3]       |
| Arabidopsis thaliana | AT4G22880 | GTGGACAATTGGAATGGGAAGA    | CCGACAGAGAGAGCCTTGA       | [3]       |
| Arabidopsis thaliana | AT4G14090 | TTCCGGTGGTTGCGTTTC        | TCCACATCTCCTTCCCTCCC      | [3]       |
| Arabidopsis thaliana | AT1G66400 | CAAAATCAACACAACCATCACC    | AAGGATCTCGGCTAATGAGT      | [3]       |
| Arabidopsis thaliana | AT5G06100 | CACCTCATTGGTGGTGTGGA      | TCGGCTGTGATCAAAAGGCT      | [4]       |
| Arabidopsis thaliana | AT4G36920 | CGGCTCAGGATGAACCAACA      | CGGCCGCTACCAATGTTGCTGCTG  | [4]       |
| Arabidopsis thaliana | AT1G01040 | CGTTGTTATGCGTTTCGACCTTGC  | AACGCTGCGTGAGATACATTTCTC  | [4]       |
| Arabidopsis thaliana | AT2G27100 | TGGCTATGGACCACCCGATAGAAG  | CCCAGTCTGATAGCGACCCATAA   | [4]       |
| Arabidopsis thaliana | AT1G09700 | CTCTTCGCCGTGCCCTACTAACCTA | GCATACTCCTGCAACCGACTTTTGA | [4]       |
| Arabidopsis thaliana | AT1G48410 | TGGAACGGTGAATAATTGGATCTGC | TGGTTCCGGATTAATGCCATGC    | [4]       |
| Arabidopsis thaliana | AT3G18780 | GCACCCTGTTCTTCTTACCG      | AACCCTCGTAGATTGGCACA      | [4]       |
| Arabidopsis thaliana | AT5G13710 | TGCACAAAGATGGAAAGGAG      | CGGTAACAACCTGAATTGCTG     | [5]       |
| Arabidopsis thaliana | AT1G21110 | CATCTCCTCCTTCTAGCACCA     | TAGGAAAGGAGCAGAGGGTCT     | [5]       |
| Arabidopsis thaliana | AT1G76680 | AGATCGGACCAGACCGTGTT      | CGTTTTCTCATCGGCATTA       | [5]       |
| Arabidopsis thaliana | AT5G57550 | CGCGTTCCATAGACTCGAGTA     | ATGGAACCCCTCATCACATCGT    | [5]       |
| Arabidopsis thaliana | AT3G57540 | AGGTTGCGAGGGTCTTGAAGTTG   | AATGATCGTTTGGCCGGAGGTC    | [6]       |
| Arabidopsis thaliana | AT3G25400 | TCTTGCTATGGTGGGTGAAGTGG   | TTTCCAATCTGGACATCCTCTTGC  | [6]       |
| Arabidopsis thaliana | AT1G23870 | ACTCGCAAATGAGCCTGTAGTCG   | TAGACCTTTGCTTACTCCCTGTGG  | [6]       |
| Arabidopsis thaliana | AT5G61600 | AAACAGGCCCTAGAACCATCACC   | ATTCGGTAAGGGCGGTTTACGC    | [6]       |
| Arabidopsis thaliana | AT3G48360 | TCCCTCTCTGCAGGCAATTTAGG   | CACCAGAAGCTTCCACTTGGTG    | [6]       |
| Arabidopsis thaliana | AT1G13320 | CGGGCTACGAAGGGCTAT        | ACCTCAATCGCGGTTTCA        | [7]       |
| Arabidopsis thaliana | AT2G28390 | GCCTCAAGCCATTCTCA         | GCCTCAAGCCATTCTCA         | [7]       |
| Arabidopsis thaliana | AT5G60390 | CGGTGCCAGTGGGACGTGTT      | TGGCGGCACCCTTAGCTGGA      | [8]       |
| Arabidopsis thaliana | AT1G13440 | AGGCTGGGATTGCATTGAGCGA    | ACACACAACTCTCGCCGGTGT     | [8]       |
| Arabidopsis thaliana | AT3G52430 | TGGGCTTGCCAGTCACCGGA      | AAGACGCGGAATGACGGCGG      | [8]       |
| Arabidopsis thaliana | AT2G29350 | AGCCTCTGGCTCAGGGAGCA      | TGTCGCTCGCCATTGCGAA       | [8]       |
| Arabidopsis thaliana | AT4G02380 | ACGTGGTTATGCGGCCACGG      | TGCTCGTAGCTCAGCCGCGT      | [8]       |
| Arabidopsis thaliana | AT2G14610 | CGAAAGCTCAAGATAGCCCA      | AAGGCCACCAAGAGTGTATG      | [8]       |
| Arabidopsis thaliana | AT1G74710 | TATCTCCGGCAGCCGCCACT      | CGGGACGACCAACGTCACTGC     | [8]       |



|                      |           |                            |                            |      |
|----------------------|-----------|----------------------------|----------------------------|------|
| Arabidopsis thaliana | AT5G44420 | TGCTTTCGACGCACCGGCAA       | TGCATTACTGTTCCGCAAACCCC    | [8]  |
| Arabidopsis thaliana | AT4G17490 | TGCACCACCGAACCGAACC        | GCGAATTTCCCCACGGCCT        | [8]  |
| Arabidopsis thaliana | AT1G19180 | CCGGGCAAGTGATTGTATTC       | TGCGATAGTAGCGATGTTGC       | [8]  |
| Arabidopsis thaliana | AT1G74950 | TCGGTTCCTTGAGAAGAGGA       | GACAGGCTCGAAGTTTACCG       | [8]  |
| Arabidopsis thaliana | AT2G34600 | GCTCGTTGGACGAATCAAGCAGC    | TGTTGGAGGATCCGAACCGTCTG    | [8]  |
| Arabidopsis thaliana | AT3G45140 | ATACCCATCGCAGAAACAGG       | TGGAGCTTGCCTTTGAATCT       | [8]  |
| Arabidopsis thaliana | AT5G24770 | CGGGGGCGTACTGGTTGTG        | CCTCAAGTTCGAACCATTAGGCTTCA | [8]  |
| Arabidopsis thaliana | AT1G22770 | GGTCGACGGTTTATCCAATCTA     | CGGACTATTCATTCCGTTCTTC     | [9]  |
| Arabidopsis thaliana | AT5G15840 | CAGGGACTCACTACAACGACAATG   | TCCGGCACAAACACCAGTTT       | [9]  |
| Arabidopsis thaliana | AT1G65480 | AGATTGGTGGAGAAGACC         | CCAGTTGTAGCAGGGATA         | [9]  |
| Arabidopsis thaliana | AT1G68050 | GAAGTCTTCACTGGCTATCG       | GATCAACCAATGGGTGACG        | [9]  |
| Arabidopsis thaliana | AT3G12110 | GTTCTTTCCCTCTACGCT         | CTTACGATTTACGCTCT          | [9]  |
| Arabidopsis thaliana | AT4G12020 | CGATTTATGCCTCCGAAG         | CGACTTGTTGTATCCATTC        | [9]  |
| Arabidopsis thaliana | AT4G26640 | CGCCGAAACTCTGGTGGTATG      | TGACGCTGCCGCTTCTCC         | [9]  |
| Arabidopsis thaliana | AT1G80840 | TCACTATTGGCGTTACTCGTATG    | CCTCTCGGTTATGTTGCTCTTG     | [9]  |
| Arabidopsis thaliana | AT5G28650 | AACAAGATTGCGGACATAACC      | GCCTTCATAAGTCACAATAAGC     | [9]  |
| Arabidopsis thaliana | AT5G15130 | TGTGTTAGAGCAAGATGTG        | CATAGGTTGTGATTAGTATAGAC    | [9]  |
| Arabidopsis thaliana | AT1G29280 | ACCAAATTCTTCAACCTTTAACG    | TTGTGCCGAGATCCTTCC         | [9]  |
| Arabidopsis thaliana | AT5G64810 | ATCTCATCTCCGACAAGCATC      | AACCATCATCCATCACATCAATC    | [9]  |
| Arabidopsis thaliana | AT2G40750 | CCGTCGCCGTCTCTGTCC         | TCTCGTCTTTCTAGTGTAGCATCC   | [9]  |
| Arabidopsis thaliana | AT2G37260 | CGAGATTGTAGACGCTGCTATAAG   | AGAGACGGTTGCTTTGGAGAC      | [9]  |
| Arabidopsis thaliana | AT5G60390 | ATGCCCCAGGACATCGTGATTTTCA  | TTGGCGGCACCCTTAGCTGGATCA   | [10] |
| Arabidopsis thaliana | AT5G09810 | CTCAGCACCTTCCAACAGATGTGGA  | CCAAAAAATGAACCAAGGACCAAA   | [10] |
| Arabidopsis thaliana | AT3G22886 | GTGTAGTCAACTGTGTGCGTT      | GCACAACCTGTTGCTCAGGT       | [10] |
| Arabidopsis thaliana | AT3G04765 | TTCATGCTACAATCATTAGCAGGT   | AGTCGTCTTCATGTCTGTATGT     | [10] |
| Arabidopsis thaliana | AT1G31173 | GAGTTGTGGCCATTAAGAGCT      | CTTCTTGTTAATGTTTGCTCTCTCCT | [10] |
| Arabidopsis thaliana | AT2G39885 | ACGGCAACTCAGACCCAAGAG      | AAGAGGAACACGATCCATTGAC     | [10] |
| Arabidopsis thaliana | AT2G10606 | AGGGTTTCGTCTGCTCTACAT      | TCTGATTATGGAATCAATCACGCT   | [10] |
| Arabidopsis thaliana | AT2G03445 | CAGGCCCTTATATGGTCGAGGC     | GGTGAAAAAATGGAACAGGGGAGAT  | [10] |
| Arabidopsis thaliana | AT5G14545 | TAACAAGAAGATATCAATATATCA   | ACCATTTGGTAAATGAGTAAAAGCCA | [10] |
|                      |           |                            | GCC                        |      |
| Arabidopsis thaliana | AT5G14565 | TCGAAACTCAAAGTAAACAGTCC    | ATTTGGTAAATGAATAGAAGCCACG  | [10] |
| Arabidopsis thaliana | AT5G37026 | AGATGAAGCAAGAAAGCAACA      | AGGAAATTTGGATAAAAACCAAA    | [10] |
| Arabidopsis thaliana | AT1G48420 | CGGGATCCATGAGAGGACGAAGCTT  | ACGCGTCGACCTAGAACATTTTCCCA | [10] |
|                      |           | GACAC                      | ACACCAT                    |      |
| Arabidopsis thaliana | AT5G65720 | TGAGCAACAAAGGAATGGAG       | ATCGGATCCGTGTTGAGACCATTGAA | [10] |
|                      |           |                            | TGTTCC                     |      |
| Arabidopsis thaliana | AT1G08490 | CATGCCATGGAAGGTGTGGCTATGAA | CGGGATCCTTTGAAAGAGTTGAAGAA | [10] |
|                      |           | ACTC                       | GCTCACAG                   |      |
| Arabidopsis thaliana | AT5G28030 | CATGCCATGGAAGACCGCGTC      | CCGGAATTCTCATTCAACTGGC     | [10] |
| Arabidopsis thaliana | AT1G08830 | AGACGAAGCAAAAACATTCAGAGA   | GGCCAGAAACTGTTCCACTC       | [10] |
| Arabidopsis thaliana | AT2G28190 | CGTCTTCTCATTCTCTCTTCC      | GGCATTGGCATTATGTTTCC       | [10] |
| Arabidopsis thaliana | AT5G37020 | AGATGTTTGCTATCGAAGGGTTGTTG | CCATGGGTCATCACCAGGAGAAG    | [10] |
| Arabidopsis thaliana | AT3G62980 | GCCTCTCTATCTGGCCTCTTGAC    | AGGGCAGCTCTCTGGTCTCGAGTCC  | [10] |
| Arabidopsis thaliana | AT3G26810 | AGATGCTCTCCATAGCCTTTGCAGG  | TGGCGGCGCATCCATTCTTGTTCCCA | [10] |
| Arabidopsis thaliana | AT1G12820 | AGCTCGAGATGCTTTGATAGCTTTT  | TCATTCTGTTCCATCCATTATTCTCA | [10] |
|                      |           | G                          |                            |      |
| Arabidopsis thaliana | AT2G22840 | GATTACCTCCCATGGGAAAA       | TCCTCCTAAACCATATCCTGAGT    | [10] |
| Arabidopsis thaliana | AT5G37025 | CATCTTTAGCTATCTTCTCTCCA    | GTAAGAAGGTGGAGGAATCTGG     | [10] |
| Arabidopsis thaliana | AT3G62130 | CGGGATCCATGGAGGCGGAGAGCG   | ACGCGTCGACCTACAATGCAGGAAG  | [10] |
|                      |           | GCGC                       | GTTTTGAC                   |      |
| Arabidopsis thaliana | AT2G25790 | ACGGAAGTTTGGTCAAGTGG       | ATGGCCGTACATTTCAAAGC       | [11] |
| Arabidopsis thaliana | AT3G24500 | TTCGCGTTGTTCTTTCTCT        | CCGGCATCGAATTTCTTAAC       | [11] |
| Arabidopsis thaliana | AT1G47610 | GTGCGGCGGATAAGAAGATA       | ACCACCGCCAAACACTTAAC       | [11] |
| Arabidopsis thaliana | AT4G10850 | TTGGTTTGGGTTCTTTACGG       | CGTTGAAAACGCAACATACG       | [11] |
| Arabidopsis thaliana | AT5G52390 | GACGATGTGAAGTGCAGAGAA      | CAACAATGCGTCCGAAGATA       | [11] |
| Arabidopsis thaliana | AT1G02070 | GCTAGACATGGCGGTTCTTC       | CCGTCTTAGGCGACGTAAC        | [11] |
| Arabidopsis thaliana | AT2G46680 | GACCGGAGATGGAGATGAAA       | CTTCTCAAACCCACCAAAA        | [11] |
| Arabidopsis thaliana | AT4G16190 | GCCGCAAGTTTTTAGGACTG       | GCCGCAAGTTTTTAGGACTG       | [11] |
| Arabidopsis thaliana | AT5G60490 | TCGTTAACCGATGAGCAACA       | GTTACGCCGACGTGATATT        | [11] |

|                      |           |                             |                             |      |
|----------------------|-----------|-----------------------------|-----------------------------|------|
| Arabidopsis thaliana | AT1G76110 | AATCCCTCAACGAGCAAAGA        | TGGGCCGAATGATAAAGAAC        | [11] |
| Arabidopsis thaliana | AT5G55840 | AAGACAGTGAAGGTGCACCTTACT    | GTTTTTGAGTTGTATTTGTCAGAGAAA | [12] |
|                      |           |                             | G                           |      |
| Arabidopsis thaliana | AT5G08290 | TTACTGTTTTCGGTTGTTCTCCATTT  | CACTGAATCATGTTCTGAAGCAAGT   | [12] |
| Arabidopsis thaliana | AT1G12110 | CCACATGCTATTCTGCGTTTGGACC   | CATCCCTTACGATTTACACGCTCTGC  | [13] |
| Arabidopsis thaliana | AT1G02790 | CGGTCTATGATATTA             | GCTGGTCGTAGCGATGATT         | [13] |
| Arabidopsis thaliana | AT1G17150 | CTCCGAACAACGACGACA          | ATCCCATTCATGCTTGAGTT        | [13] |
| Arabidopsis thaliana | AT1G43080 | GCTATGACTATGGGATTTGC        | CCGTCAGTATTTGGGCTAT         | [13] |
| Arabidopsis thaliana | AT1G43090 | CCCTCACCCACCTTGTA           | GGACCATTGAGTCAATCTAGACA     | [13] |
| Arabidopsis thaliana | AT5G51810 | AGAAACCTTCCATTGACATTCCA     | AGAGATCGATGAACGGGACG        | [14] |
| Arabidopsis thaliana | AT1G60980 | CTATCCAAAATGCAAGCAACCA      | CAGTGAGGCCCGTACCTAGT        | [14] |
| Arabidopsis thaliana | AT4G21200 | CATGGAGCAATGGCATGTACA       | GGTTCGTATCACACGGTGTT        | [14] |
| Arabidopsis thaliana | AT1G15550 | GATCTCCTCTTCTCCGCTGCT       | GAGGGATGTTTTACCCGGTG        | [14] |
| Arabidopsis thaliana | AT1G66350 | TCAGTGGCGGTTAACTCGGT        | GGGATGAGCTAAGAGGCGATG       | [14] |
| Arabidopsis thaliana | AT3G05120 | GTGACGGTTAGAGACCGCGA        | TCCCTCGGGTAAAAACGCTT        | [14] |
| Arabidopsis thaliana | AT3G63010 | TCGCCCTGACGGTTCTTTC         | TTACGGTCAAGGAACTCGGC        | [14] |
| Arabidopsis thaliana | AT1G14920 | AATGAATTGATCTGTTGAACCGG     | GGCTTCGGTCGGAAATCTATC       | [14] |
| Arabidopsis thaliana | AT5G39860 | CAAAATTTGCCGGAGATTGG        | GGCTGATGCCTTATCAGAACG       | [14] |
| Arabidopsis thaliana | AT3G28857 | CTCCGATGACCAGATGATCGA       | GGCAAAAACCTGACGGAGCTT       | [14] |
| Arabidopsis thaliana | AT5G15150 | TCCCTTCTTCGATCCGATCC        | CAATATGGGTAGAGGTGCTGGTC     | [14] |
| Arabidopsis thaliana | AT1G56650 | TTGGTTCCTGAAGCGACGAC        | GTCAAAGCCAAGGTGTCCC         | [14] |
| Arabidopsis thaliana | AT5G55250 | CTGCCTTCTCCTTGCAATTGG       | TATCCGTACACTTTCCGGC         | [14] |
| Arabidopsis thaliana | AT1G04610 | AAGATCAAATCGTCCCGG          | CTCAACTTTGCCCTTTGCCGA       | [14] |
| Arabidopsis thaliana | AT3G18780 | CTCAGGTATCGCTGACCGTATGAG    | CTTGGAGATCCACATCTGCTGGAATG  | [15] |
| Arabidopsis thaliana | AT5G19400 | TTGCTTCTTATTCGAGGGATGAGTTTG | TCTTGGATGAGTCTTTGGAGGGC     | [15] |
| Arabidopsis thaliana | AT3G57260 | ATCTTGAACGTCTCGCCTCC        | CTTCAAGCCCTGCTCCAGAA        | [16] |
| Arabidopsis thaliana | AT5G22570 | ATTGGAGGGACGATTCACCG        | GTGGTTCGGTAAACCGGAGG        | [16] |
| Arabidopsis thaliana | AT2G40750 | ACATGCACTGCCAATGACCA        | TCCTTAACCATGCCTGCGTC        | [16] |
| Arabidopsis thaliana | AT3G25882 | GACACGAACGGTTGCGAAAG        | AACCCAAACCTGTAACCCG         | [16] |
| Arabidopsis thaliana | AT4G23810 | TTTGCCGATGGAGGAGGTTT        | TCTAAGCCTCTCTCTGGGCT        | [16] |
| Arabidopsis thaliana | AT1G02450 | AAGCACGGAAACGTAGACGA        | GGCTTCAAACCCGTACGACA        | [16] |
| Arabidopsis thaliana | AT3G20600 | TGAAGACACAGAAGGTGGTCCG      | GTCTTTTCCGAGGGCAGGAA        | [16] |
| Arabidopsis thaliana | AT1G75040 | CTCGGCGATGGAGGATTTGA        | AATTCAGCCAGAGTGACGGG        | [16] |
| Arabidopsis thaliana | AT4G35985 | ATGGAATGCTCTGCAACTCCTCCAA   | GCAAGCGAGCTCTACGCTGTAGGAT   | [17] |
|                      |           | GCTT                        | TTGTC                       |      |
| Arabidopsis thaliana | AT4G35987 | ATGGATCCCCTTCTTCTTCTTCTCT   | CTCGAAGTCATTGAGATCACTACAAT  | [17] |
|                      |           | GCT                         | TAT                         |      |
| Arabidopsis thaliana | AT3G45640 | TGACGTTTGACCCCAACAGA        | CTGTTCCCTCATCCAGAGGCTG      | [18] |
| Arabidopsis thaliana | AT2G43790 | CCGACAGTGCATCCTTTAGCT       | TGGGCCAATGCGTCTAAAAC        | [18] |
| Arabidopsis thaliana | AT2G14610 | TCGGAGCTACGCAGAACAAC        | TCTCGCTAACCACATGTTCA        | [18] |
| Arabidopsis thaliana | AT2G44050 | TTGGAAGGAGCGATTGAGACT       | CAAGATTTTGTGCAACAACACC      | [18] |
| Arabidopsis thaliana | AT2G22450 | TGAAAGGCGAAGACTTGGAGA       | CGAGCTGAGACACCTGTGGAT       | [18] |
| Arabidopsis thaliana | AT3G18780 | GGCAAGTCATCACGATTGG         | CAGCTTCCATTCCACAAAC         | [18] |
| Arabidopsis thaliana | AT5G60850 | ATTCCAAAAGAAGCTTCTCGC       | CTGATGAGCTCTCATCCTTCG       | [19] |
| Arabidopsis thaliana | AT1G69310 | TTAACATCATTAAAACGTGAGACG    | AGAGAGAGTCTGAGATCGGTCC      | [19] |
| Arabidopsis thaliana | AT2G36720 | TTGAATACACCATGCTCGATG       | TAGGCCATATTTGTATTGCGG       | [19] |
| Arabidopsis thaliana | AT5G24930 | CTTCTCTTCTTCTTCTCATCGCC     | CTGCTTCGTGGCTGTTACTTC       | [19] |
| Arabidopsis thaliana | AT4G01680 | CAAATGTCGTAAGCCATTAAC       | GGTTACACCACAAGCTCTTAACCG    | [19] |
| Arabidopsis thaliana | AT5G15970 | CAAACACACATCAAAAACG         | TACTCTTCCCGCTGTTGC          | [20] |
| Arabidopsis thaliana | AT2G42530 | GGCGATGTCTTTATCAGGAG        | AGGATGTTGCCGTCACTTTT        | [20] |
| Arabidopsis thaliana | AT1G31330 | AGGACTCAAACAGTTTCGCT        | GTAAACCGTCTGACCCGCAT        | [20] |
| Arabidopsis thaliana | AT1G29910 | AATGAGGAAGACTGTTGCCA        | CGGTGTCCCATCCGTAGTCT        | [20] |
| Arabidopsis thaliana | AT1G29930 | GCTCTCTCCTCCCCTGCCTT        | ACGGTTCCTTGCGAATGTCT        | [20] |
| Arabidopsis thaliana | AT2G34420 | CGGTGACTACGGATGGGACA        | CCAATCCTCCGTGCTGAA          | [20] |
| Arabidopsis thaliana | AT3G12500 | GGCCAGACTTCCCATGAAAC        | CTTGAACAGTAGCCCCATGAA       | [21] |
| Arabidopsis thaliana | AT3G04720 | GCAAGTGTAAAGGGTGAAGAACA     | GAACATTGCTACATCAAATCCAAG    | [21] |
| Arabidopsis thaliana | AT2G14610 | TTCTTCCCTCGAAAGCTCAA        | AAGGCCACCAGAGTGTATG         | [21] |
| Arabidopsis thaliana | AT3G57260 | AGCTTAGCCTCACCACCAATGT      | CCGATTTGTCCAGCTGTGTG        | [21] |
| Arabidopsis thaliana | AT1G75040 | TGTTTCATCACAAGCGGCATT       | GTCCTTGACCGGCGAGAGTTAATGC   | [21] |
|                      |           |                             | CGC                         |      |

|                      |           |                           |                            |      |
|----------------------|-----------|---------------------------|----------------------------|------|
| Arabidopsis thaliana | AT5G20820 | CCGCTCTTCCAGCAGCTA        | AACTTCGCACGACACAGAGAT      | [22] |
| Arabidopsis thaliana | AT1G06180 | CCGGGCTACTTCGGTGCGGA      | TGTTGTTGCGGAGAGGTTGGCA     | [23] |
| Arabidopsis thaliana | AT1G15550 | CCATTCACCTCCCACACTCT      | GCCAGTGATGGTGAACCTT        | [23] |
| Arabidopsis thaliana | AT1G27730 | TCGGCGACAACCACATCCGC      | AGTGGCACCGCTTGTGTCCG       | [23] |
| Arabidopsis thaliana | AT1G76520 | GGAAGTCTCTCTCCGGGTGCT     | TAACGCGCAACCAAGACGCC       | [23] |
| Arabidopsis thaliana | AT2G01290 | GCCTCTTCACCGCCTCAGCC      | TCGGTGCACGGCGTGTTTGG       | [23] |
| Arabidopsis thaliana | AT3G45140 | ATCAACGCTCGTGACGCCA       | CCGCGGGTAAGCCTTCCTGG       | [23] |
| Arabidopsis thaliana | AT4G14560 | TGGAAGTCACCAATGGGCTTAACCT | TGCGCTTGTGTTGCTTCTGACG     | [23] |
| Arabidopsis thaliana | AT4G25470 | AGACCATGAGCATCCGTCGTCATA  | CGGAATCAACCTGTGCCAAGGAAA   | [23] |
| Arabidopsis thaliana | AT5G11060 | CAACACGAAAACGATGGCGTTT    | CATCTGCCACCTCTCCGCCTCC     | [23] |
| Arabidopsis thaliana | AT5G44420 | CTTGTCTCTTTGCTGCTTTTCGAC  | ATGCATTACTGTTTCCGCAAACC    | [23] |
| Arabidopsis thaliana | AT5G61850 | AAATGCCCCACCAAGGTGACGAAC  | ACTCGCTCCTGATTTCTTCGCGTA   | [23] |
| Arabidopsis thaliana | AT1G69120 | CAGACCACCCATGTTGAGAAAA    | GCACCAAATCCAGCATCCTT       | [23] |
| Arabidopsis thaliana | AT1G47530 | GCTTTGTTTGGAGTTTTGGTACTTG | CCACCCTTCTATATTCATGCAAATG  | [24] |
| Arabidopsis thaliana | AT3G06620 | TCGGACAAGTTTCATGTGGAA     | ACACTTTTACAGCTACATCAGATCCA | [24] |
|                      |           |                           | A                          |      |
| Arabidopsis thaliana | AT4G35800 | ACAGTCCCAGCAGCCCATAC      | AATCATGACCTAAAACATGGATTGC  | [24] |
| Arabidopsis thaliana | AT5G65080 | TTTTTTGCCCCCTTCGAATC      | ATCTTCCGCCACCACATTGTAC     | [25] |
| Arabidopsis thaliana | AT1G13440 | TCTCGATCTCAATTCGCAAAA     | CGAAACCGTTGATTCCGATTC      | [25] |
| Arabidopsis thaliana | AT1G13440 | TTGGTGACAACAGGTCAAGCA     | AAACTTGTCGCTCAATGCAATC     | [25] |
| Arabidopsis thaliana | AT4G05320 | GGCCTTGATAATCCCTGATGAATAA | AAAGAGATAACAGGAACGGAAACATA | [25] |
|                      |           | G                         | GT                         |      |
| Arabidopsis thaliana | AT2G43100 | AACATGCTCCGGTCTGTCTTGG    | TGCGTAAGACTCAGCAACTATGGC   | [25] |
| Arabidopsis thaliana | AT5G60890 | AGACCCGACATTAAGAGAGGAGAG  | ATTGCGGCCCACTTGTTACC       | [25] |
| Arabidopsis thaliana | AT3G19710 | TCGTGATTTCCGGTACCAGGTC    | AGCTTCGTCCGCATCGAGAAAAG    | [25] |
| Arabidopsis thaliana | AT4G39950 | TCAAACCCACCATTAAGGAGCTTG  | TTCCACGGCGTTTGATGGATTG     | [25] |
| Arabidopsis thaliana | AT2G22330 | ACCGGAAAGAGAGGATGTGCTG    | CGCTAGCATCATGGTCGTTATCGC   | [25] |
| Arabidopsis thaliana | AT1G16410 | CATTATGTCCCTTCCCATCTTGCG  | ACATGAATGTGGCTACCTTTGGG    | [25] |
| Arabidopsis thaliana | AT1G16400 | CCTCATGTTGCCCGTCAAGATACC  | ACGCTCCGGTTCGTATGCTAATG    | [25] |
| Arabidopsis thaliana | AT5G57220 | CATCATCAAAGGGCTCATGCTCAG  | AATGTTACGGCCGCAGTATCCG     | [25] |
| Arabidopsis thaliana | AT4G13770 | AAGAGAGTCAAGCCCGAAACCG    | GTTCCCGCCACTACAATATCCAAG   | [25] |
| Arabidopsis thaliana | AT4G31500 | TGGATATTGTTGTGCCGGGAACTG  | ACACTCCTCACTTCGTCTTGAGC    | [25] |
| Arabidopsis thaliana | AT3G14210 | GCGCCGGTTGAATCTATGACAC    | TTTCTCGATGTAGCTGTGCTTCC    | [25] |
| Arabidopsis thaliana | AT1G54040 | TGAATACTCCCACGCGTTTACG    | AGCTGAGCCCATTTCCCATCAG     | [25] |
| Arabidopsis thaliana | AT1G62540 | GCCGTTGTTGTTTGCAGTGGAC    | ATTTCCGATGACCACCACCACCTC   | [25] |
| Arabidopsis thaliana | AT1G12140 | CTTCATCGGTTTACCCTGGATGAC  | GCCTCACGCTTTGCATAGTAGG     | [25] |
| Arabidopsis thaliana | AT4G23100 | TGTCCTGAAACTCGCAAAGGATG   | CATCGACTGCGTTCAAGAAACCG    | [25] |
| Arabidopsis thaliana | AT5G61420 | AGACTGCGATGGACCAACTACC    | TCTCGCTATGACCGACCACTTG     | [25] |
| Arabidopsis thaliana | AT5G07690 | AGTTGTAGATTGCGATGGGCTAAC  | TGTCTCGCTATGACTGACCACTTG   | [25] |
| Arabidopsis thaliana | AT1G18570 | CCTTCACGGCAACAAATGGTCTG   | TACCGGAGGTTATGCCCTTGTG     | [25] |
| Arabidopsis thaliana | AT1G74080 | GAGAGTTTAGCCAAGACGAGGAAG  | CTATGGCCGACCATTTGTTGCC     | [25] |
| Arabidopsis thaliana | AT5G23010 | AAGTGGAATGCGTCGCTTGAG     | AGCCCGTGTACTCTTGAACCATC    | [25] |
| Arabidopsis thaliana | AT5G23020 | TGCTACCGCCAACACAATATCCG   | ACATTTCAAAGCCATCAGCACCCTC  | [25] |
| Arabidopsis thaliana | AT3G16400 | TGCTTGGGAAGTGATTAAGGTG    | GGGCTGATTTGGTGTGAACTCG     | [25] |
| Arabidopsis thaliana | AT3G16390 | GCGCGATTTGATCATGACCGTTTG  | CATCACACAGACACACAGACACAC   | [25] |
| Arabidopsis thaliana | AT5G48180 | TGTTTCCGGCGGTTTCTTACGG    | TAAGCTCATGCGGCTCTTCCTC     | [25] |
| Arabidopsis thaliana | AT2G44490 | TGCGCATAATCCACTTTGTACG    | AGTCGGATGCTGATGCCAAC       | [25] |
| Arabidopsis thaliana | AT1G59870 | ACTGCAGATGGGAACAGAAGAGG   | TTCTTATTGCCTGCACCACCTG     | [25] |
| Arabidopsis thaliana | AT2G20610 | CCGGCAAAGGCAATTCTTACGG    | TCATATAATCAGCAACGGCTCGTC   | [25] |
| Arabidopsis thaliana | AT5G26000 | ATGGACTCACGCACAACCTCTCAC  | AGTAACTGGCTGCATTGAACGG     | [25] |
| Arabidopsis thaliana | AT5G25980 | CCGCAAGGCCATCAAGTAAAAG    | AATCTGACGGTGTAGCCGTTGC     | [25] |
| Arabidopsis thaliana | AT1G24100 | ACGTTGGAAGGGTTGAGTTTGGG   | TCTGATCACTCCACTGAGGCACAC   | [25] |
| Arabidopsis thaliana | AT4G25420 | CGAACGATAGATACAAGAGC      | CGGACACAAGAAGAATGC         | [26] |
| Arabidopsis thaliana | AT5G51810 | GCCAGACGAAGAGAAACC        | ATTGACGACGAGGAAGAAG        | [26] |
| Arabidopsis thaliana | AT5G07200 | ACATCTCTAACCATACTTCATC    | ACTCTTGATCTTCCATTTCG       | [26] |
| Arabidopsis thaliana | AT1G60980 | ACTGCGACCCAACCTCTC        | GCCAATGTTCCACCACCAATG      | [26] |
| Arabidopsis thaliana | AT1G15550 | GCTCGTATCGCATCTTTC        | ATCGCAGTAGTTGAGGTG         | [26] |
| Arabidopsis thaliana | AT1G80340 | TGGTTCGCATTAGGTTCACTG     | TGGCTCTGTCTGGTTCTGG        | [26] |
| Arabidopsis thaliana | AT1G80330 | GACTCCTCCCTACTTACCATTCT   | GGCTCTACTCCAATCCATCTC      | [26] |
| Arabidopsis thaliana | AT1G78440 | CAAGAGCGTGAGGCATAGG       | GAAGGTCCAGCGAAGTAAATC      | [26] |

|                      |           |                            |                            |      |
|----------------------|-----------|----------------------------|----------------------------|------|
| Arabidopsis thaliana | AT1G30040 | ATCTCCTCCTCAATGCTAATCC     | TACTCCTCCACCGACTCAC        | [26] |
| Arabidopsis thaliana | AT2G34555 | GGAGCAAGAAGCCATCAAC        | TACTCAAGCCAGCCAAGG         | [26] |
| Arabidopsis thaliana | AT1G02400 | GTAAGGCATAGAGCATTGAC       | ACAACCGTGGCTGATTC          | [26] |
| Arabidopsis thaliana | AT1G02400 | TGAGCTTGAGTATCTTCTTC       | TAACCGTGCATATGTAATC        | [26] |
| Arabidopsis thaliana | AT1G50960 | TTCTTCGTATGTCCTTATCTC      | ATGTTCACTCTGCTCTTTG        | [26] |
| Arabidopsis thaliana | AT4G21200 | TGGATGTGTTGGAGAAGATGAG     | CGGATAGAAGTGGCTGACG        | [26] |
| Arabidopsis thaliana | AT2G17270 | TGTCTTGCTGGCTATACTG        | CATTCTTGGCTTTGTTGTTG       | [26] |
| Arabidopsis thaliana | AT3G48850 | CGATTACGCCACTTGATG         | GCTCTTTGATTGTTGTCTTG       | [26] |
| Arabidopsis thaliana | AT5G14040 | AAAGAGCAAGGAGTCAAAGG       | CAGCAAGGTCAGAGTAAGTC       | [26] |
| Arabidopsis thaliana | AT5G04150 | CGCCTTGACTCTTCACTTCGTGC    | CTCCGAGACAAACGTTGAAGTTC    | [27] |
| Arabidopsis thaliana | AT1G51070 | AAGGACATGGTCCCTGTGAGG      | AAGCAAGCTTGTCCCTTTCA       | [27] |
| Arabidopsis thaliana | AT1G21630 | CACAACAGGGTTCATTGAGCCAG    | AGGTGGACCAGAAGCCGCAC       | [28] |
| Arabidopsis thaliana | AT1G64580 | TTCTGATTCAATTGTTTCTGCCGATG | CGTTGAGGAGAGAGCCAAGAGTGAC  | [28] |
| Arabidopsis thaliana | AT1G68670 | TCGGAAGGAGTTATCTGGTACGACG  | AAGACAGGACCACCACAAACACTTG  | [28] |
| Arabidopsis thaliana | AT1G68800 | AGGCGAGCAAGACGATTGAATG     | CCTTTCCTCCTCCTCCGATGC      | [28] |
| Arabidopsis thaliana | AT1G78240 | CCATTCCCGACTTACCCGAGAAC    | TCCCTCTGGACGAAGCAATCG      | [28] |
| Arabidopsis thaliana | AT2G02860 | CGCAATCGTTATTCCCAGATG      | AAGCAGCAACAGACGCCAAAAC     | [28] |
| Arabidopsis thaliana | AT2G03710 | CCTTCTCTACCCAGACAGCGTGG    | CACCCCATCCAGCAACTCCC       | [28] |
| Arabidopsis thaliana | AT2G17630 | AACCCAACACCATCAACCTCACC    | AATGCGGCTGGACCTGCG         | [28] |
| Arabidopsis thaliana | AT2G27940 | TTCCGCCACTTCGCAGACAG       | CCTGAGAATCAAGACCCCTCCG     | [28] |
| Arabidopsis thaliana | AT2G28600 | ATGGCGAAAGGAGACGATAATGTG   | ATGGCGGCGATACGAGCAG        | [28] |
| Arabidopsis thaliana | AT2G30260 | CCCAACGACCAAAACACGGC       | TCGGCTGGAACGAAGGCG         | [28] |
| Arabidopsis thaliana | AT3G23430 | CCAAACACAGCGTTGCGTTACC     | GAGGCTCGGAGGATGAGGTGG      | [28] |
| Arabidopsis thaliana | AT3G55580 | CAGTCTGACAACATTGACCTCTCGG  | GTATGACGACCACCAGCAGCAAC    | [28] |
| Arabidopsis thaliana | AT3G57600 | TGGAAGAAGGGTCCCTGCTCGG     | CAAGTCCTTTGCCTGACTCCACG    | [28] |
| Arabidopsis thaliana | AT4G06746 | GTTCATACAAAACCGCCGTTGC     | TGAGTCTCGCCGAAGGACCAC      | [28] |
| Arabidopsis thaliana | AT4G18720 | AGCGAGACAAAGTGCGTGAGATTC   | CCACAGATACAGCCACAACCCAAAG  | [28] |
| Arabidopsis thaliana | AT4G20340 | AGCCGTTTGTCAAGCTGGTGAG     | TCTAACCCATTGCCGCCTCG       | [28] |
| Arabidopsis thaliana | AT4G33250 | CCAGACTTCAGCCTTTGCCTCTTC   | CCAGAACTGTTGGAACCTCCCAG    | [28] |
| Arabidopsis thaliana | AT5G01840 | GGAACCGTCTTCGTCACCGAG      | ACCTGTTTCTGTGGTAGTGCTGTGCG | [28] |
| Arabidopsis thaliana | AT5G15630 | CGGCAGATGGCTATGTGGCTAC     | TGTCCAACCTAATGTCCAACCAGG   | [28] |
| Arabidopsis thaliana | AT5G15850 | ATGCTGCCAATCGTCTTGCTTC     | TGCGGAATGAATCTCTGAATCACAG  | [28] |
| Arabidopsis thaliana | AT5G61430 | CCTGCTTCTCCAACCAAACGG      | AATCCTGTGAAAAATGTCGGCTTG   | [28] |
| Arabidopsis thaliana | AT3G49120 | AGTTAAGGTCGGACCCTCGT       | GAGCTGCAATGGTGAGCATA       | [29] |
| Arabidopsis thaliana | AT3G16530 | GCTTTATCCATGACCCGAGA       | TTGACCCGAGTTAGGTTTGG       | [29] |
| Arabidopsis thaliana | AT4G12910 | TTACGCCGGAGTTTATGTCC       | TCGCACTCGAGTCCCTCTAT       | [29] |
| Arabidopsis thaliana | AT4G37530 | AAGCTACCCAAACCGACCTT       | GAGGACACGACGCTTTTAGC       | [29] |
| Arabidopsis thaliana | AT5G05340 | TTACGTCGTCGAAGCACAAC       | TGACAAAGCAATCGTGGAAG       | [29] |
| Arabidopsis thaliana | AT5G06720 | ACGCTGGTCCGAATGTAAC        | TTTCGATGGGAGAAGGAATG       | [29] |
| Arabidopsis thaliana | AT5G08370 | TCTCTCCTCAAATGGGATGG       | TGAGTTCACCCCAACAATCA       | [29] |
| Arabidopsis thaliana | AT1G30230 | ATGTCCAGAGCTGTGACATTGTTG   | CAAGCGATGAACAGAGGGGAAGGAA  | [30] |
| Arabidopsis thaliana | AT1G30230 | CGACGAGCATCTTCTCACTCGCA    | ACACCAGAGATCCTCAAGAGGGCA   | [30] |
| Arabidopsis thaliana | AT2G37040 | CCGGACTTCTCACCGGTCGT       | CGCCGTGCCATTGACTAGCG       | [30] |
| Arabidopsis thaliana | AT1G51680 | AGGCTTTGCTCATCGGTATCCT     | ACCTGTTTTCGACACGAATTGCTTCA | [30] |
| Arabidopsis thaliana | AT2G30490 | ACCGGGTGTGCAAGTCACCGA      | AGCCAGCGAGCTTCGCATCA       | [30] |
| Arabidopsis thaliana | AT4G36220 | CCACGAAACCGCGGAGGACA       | TCCGGTACGCCCGTTCCAA        | [30] |
| Arabidopsis thaliana | AT5G48930 | GCAACATCACGCGGCAGATGG      | AAAGCAGGCTGTGGCGGGTC       | [30] |
| Arabidopsis thaliana | AT2G40890 | TGTCCCGGTGCACAACCTTGG      | CGCTTGCACAGGGGTACG         | [30] |
| Arabidopsis thaliana | AT1G15950 | CCTTTCGACCAAGTGCAAGG       | GGCCTTCTCTTGTAAAGCTCTTGACT | [30] |
|                      |           |                            | G                          |      |
| Arabidopsis thaliana | AT5G54160 | AGCGCGTTTCGAGTACCACGG      | AGCACCAATGCCACCACCAACA     | [30] |
| Arabidopsis thaliana | AT4G34050 | TCTCGCCACCGCTCTTGCTC       | AGAGCAGGGCCTTCCCTGAAGT     | [30] |
| Arabidopsis thaliana | AT3G19450 | TCTGGTGGAGGAGGCTGCAACA     | AGCCAAAGCATTCTGTTTGAACCA   | [30] |
| Arabidopsis thaliana | AT2G38080 | CCCTTCTCCCCCGAAAACG        | TTAGCCCAAGGCCGACGGTG       | [30] |
| Arabidopsis thaliana | AT5G05170 | TCAGAGCGGATGCTTGTTGGC      | GGCGTTCAGGTGAGGCAGCA       | [30] |
| Arabidopsis thaliana | AT5G44030 | CCTCGCCATGGAACCAAACACC     | AACGCACACGTGACACGC         | [30] |
| Arabidopsis thaliana | AT5G17420 | CGGCCACAGCGGAGGATTTGA      | TGTGAGTACGCCTGCCACTCG      | [30] |
| Arabidopsis thaliana | AT4G18780 | CCATCTGCAACACTTGTGGTGAA    | TCGTAAGGATTGCCGCAACGC      | [30] |
| Arabidopsis thaliana | AT5G49720 | TCGTGCGGCTCTTTCACGTCC      | AACGCGGCGGCAACAAGAGT       | [30] |
| Arabidopsis thaliana | AT4G05320 | GCTCCGACACCATCGACAACG      | CTGAGGACCAAGTGGAGGGTGA     | [30] |

|                      |           |                            |                            |      |
|----------------------|-----------|----------------------------|----------------------------|------|
| Arabidopsis thaliana | AT5G60390 | AACGGTGCCAGTGGGACGTG       | TGTCACCGGGAAGTGCCTCAA      | [30] |
| Arabidopsis thaliana | AT3G13920 | TCAGCCTCTTTTCGGATATTCCACCA | TCCTGCCATGCTGGAGCAAAGT     | [30] |
| Arabidopsis thaliana | AT1G27450 | AGTCATTGATCACGGCTTTTGTCCA  | ACGGTTGCAAGGAACAGCACGA     | [30] |
| Arabidopsis thaliana | AT5G25760 | AGTCCTGCTTGGACGCTTCAGTCT   | TTGTGCCATTGAATTGAACCCTCTC  | [30] |
| Arabidopsis thaliana | AT3G13750 | CCGCCCAGCTGAAGATATGGCC     | CGGACCACCAGCAGTTTCGACC     | [31] |
| Arabidopsis thaliana | AT3G44990 | GGGATGCATCGGACTGGGCC       | CGCTGTGCATCCCGCTAGCT       | [31] |
| Arabidopsis thaliana | AT2G46830 | TGGAGACTCATCATCGAGCTTAAA   | GCTTTCAAATGCAACTTGTGTGTG   | [31] |
| Arabidopsis thaliana | AT1G02640 | ACCCACGTTGGGGACGTGGA       | ACCGGCTACGGTCGTTTCCCT      | [31] |
| Arabidopsis thaliana | AT5G21170 | CTGCACGCAGTCGTCACCGT       | CCACGGGAACCTGAGGAGCG       | [31] |
| Arabidopsis thaliana | AT5G49360 | TGCAGGGAAGCATGCGCCT        | TCCCTTTGCAAGCCACGCCG       | [31] |
| Arabidopsis thaliana | AT1G12780 | AGCTAGAGACATTCACGCTGCGG    | CGGTATGCCCTTTGGATCTTCTCCA  | [31] |
| Arabidopsis thaliana | AT2G20750 | CACTTCTCCACTTTTCTTCTCGGTT  | TAGTGTCCGGTAGGATGACCGG     | [31] |
| Arabidopsis thaliana | AT5G20250 | CGGATGGTGCACCTGGGACGCGT    | AAACTTCGGCGGCGTACCACCGG    | [31] |
| Arabidopsis thaliana | AT5G07440 | CCGTGCATGCATCTCGAATCCTGGG  | CCGATGTATGAAACCAGAGTGCCATC | [31] |
|                      |           |                            | G                          |      |
| Arabidopsis thaliana | AT5G61380 | CATCTTCATCGGGGTGCGGCGGA    | AGCTGGCGCCATTCTGCAAGGTCT   | [31] |
| Arabidopsis thaliana | AT3G02380 | TCGTTTCAGCCGCTGCACTGTC     | AACGCAGCTGGGGCAGACTCAC     | [31] |
| Arabidopsis thaliana | AT4G04610 | CCCCTTTTGTCAAGCCATGGCAT    | ACCGAGCTGCAATTCCTGCTTAG    | [31] |
| Arabidopsis thaliana | AT3G47340 | TGATGTGCAACGCGGGGCAT       | GCAGAGTTCTGCGGGAAGAACCT    | [31] |
| Arabidopsis thaliana | AT4G35770 | GACAGGTCTCGTCCCACCTCAGGA   | TGATCGCCGTGAAGCCAGCA       | [31] |
| Arabidopsis thaliana | AT2G40610 | TGCCACCTAACCCCTGGCCT       | TGCCGGCACGATACTGAGCG       | [31] |
| Arabidopsis thaliana | AT2G33830 | CCCAACCCCTTGACATCAAAGGTG   | CACGTTTTCTTACGCGCCG        | [31] |
| Arabidopsis thaliana | AT5G57550 | ACGCGGACCAGTGGGCTACA       | CCGCCCAGGAAACACATGCA       | [31] |
| Arabidopsis thaliana | AT1G11260 | GGTTGGGGATGGCGGCTCAG       | TTCGTGTTGGCCACGCTCGA       | [31] |
| Arabidopsis thaliana | AT3G18780 | CGTACAACCGGTATTGTGCTGAT    | GCTTGGTGCAAGTGCTGTGATTC    | [32] |
| Arabidopsis thaliana | AT1G20990 | GCTGCGCCATGTTATCTCCTTCC    | ACCCTCCCCGTTTCGCTTACCTC    | [32] |
| Arabidopsis thaliana | AT1G66600 | TCGTCAACCACACCATGAGTCT     | CTCCAGGTGAAGCCGTCATC       | [32] |
| Arabidopsis thaliana | AT4G30290 | GGGGTGATGGTTCGTGAAAGATT    | CCAGCAGAGTTACCAGGGACAAGTT  | [32] |
| Arabidopsis thaliana | AT2G38600 | TCTCCAGCAATACAACCTGTTCTT   | CCTCATAATCAGCCTTTCATAACCA  | [32] |
| Arabidopsis thaliana | AT3G47480 | CTTTTCCCTTTCGTTTCCATCTC    | TCGATTATCGCCTTGACTTCTTC    | [32] |
| Arabidopsis thaliana | AT2G29350 | CAATATTCAAGCCGACCACAGA     | ACGACTCCAGCAGCAGAGGATA     | [32] |
| Arabidopsis thaliana | AT4G15690 | AGACTTTGGCGTGAACCCGACTATC  | AAGGGAGCGGTTGAGATGGAGACT   | [32] |
| Arabidopsis thaliana | AT5G19470 | TGTCCTACTCCACCTCCTT        | CAAAAACATCGTTCCAGGTGAA     | [32] |
| Arabidopsis thaliana | AT1G64780 | TCCGCCTACCTTGCTTTTGC       | ACCAAAGGCGAATGCGAATC       | [32] |
| Arabidopsis thaliana | AT5G59320 | ATGGCTTTTCGCTTTGAGGTTCTTC  | GTTGGCGGTCTGGTGTGGTTTTA    | [32] |
| Arabidopsis thaliana | AT4G02330 | CGTTCGAGACGGTCAATATCACT    | TGTCGTTGATTAGAGGCAATGC     | [32] |
| Arabidopsis thaliana | AT1G49860 | CCATATCAAGGTTTAGCCACAGACGA | GCAAGATGATGCAGATCCGCTAA    | [32] |
| Arabidopsis thaliana | AT4G19690 | CGTGCGTCAACAAAGCTAAAGC     | CGGAGGCGAAAGACTTAATGATA    | [32] |
| Arabidopsis thaliana | AT1G52890 | CCACGGTCTTTCGATACTTCTAACT  | ACCCGTGACTGCTCTCGACTTCTC   | [32] |
| Arabidopsis thaliana | AT5G53820 | CCAAGCTAAAGGCCAAACTCA      | ACTCGCACCTTGTGCCTTCT       | [32] |
| Arabidopsis thaliana | AT5G44420 | TCATCACCTTATCTTCGCTGCTCTT  | ATGATCCATGTTTGGCTCCTTCAAG  | [32] |
| Arabidopsis thaliana | AT5G38910 | TTTACGACAGAACCCACCTCACA    | GGAAACACAAAGACATCACCTCGTA  | [32] |
| Arabidopsis thaliana | AT4G26280 | ACAATCCTCACAACCTCCTCTCA    | CAAACGATATGCCAACGTGACA     | [32] |
| Arabidopsis thaliana | AT5G06510 | TGCATCACTCACGCCATCTC       | GACTCATTTGCTTCCCTCGATGA    | [32] |
| Arabidopsis thaliana | AT3G45140 | AGTCTTGTC AACGGAGGTGGAAT   | CCATGTTCTGCGGTCTTATCTTC    | [32] |
| Arabidopsis thaliana | AT1G17420 | GGCAAAGAGGTTCTTACCC        | CTTTGAGCGACGGAATTAGG       | [32] |
| Arabidopsis thaliana | AT1G30135 | CAGCTTCAAATCCAAAAGC        | TATCGTCGTGAATGGTACGG       | [32] |
| Arabidopsis thaliana | AT3G25770 | GCCAAGAAGAACCTCACTGC       | TCCGAGACCGAACATTAAGC       | [32] |
| Arabidopsis thaliana | AT5G42650 | GACCAATCAAAGACCGTTGG       | ATCGAATAAAACCGGGAAGC       | [32] |
| Arabidopsis thaliana | AT3G11410 | CATGTCTAGAGCAATTGGTGATAA   | CTCTTCTCAAGTCAACCACAA      | [33] |
| Arabidopsis thaliana | AT3G44880 | TTGGTGGCAGGTTGTACCAA       | ATCTATCTAGCATCTGACGCTT     | [33] |
| Arabidopsis thaliana | AT3G47950 | GCTGTGGCGTACCAGGAT         | GAGACCCACAAATTGCCAAG       | [33] |
| Arabidopsis thaliana | AT4G17490 | TCGTGGCCTGTACAACAAAC       | GGCTTGGGAGGAATGCTT         | [33] |
| Arabidopsis thaliana | AT4G36540 | AAGCCACCGACAGACATAGC       | TCTTGTAGACATTTTCTTCTTGC    | [33] |
| Arabidopsis thaliana | AT4G26080 | CGCTAACTGCGGTGACTCTA       | CCTCGCAGCTTCATCTTCTC       | [33] |
| Arabidopsis thaliana | AT5G16980 | TGGGGAACCTAATCCTTCC        | CACTCCGTACCCTTCTATTGGT     | [33] |
| Arabidopsis thaliana | AT5G25460 | CCGTGCTGTCTTTCTTCTT        | TCACGAGTCTCCGTTTGGTAA      | [33] |
| Arabidopsis thaliana | AT5G51890 | GAGATGTGGTCACCCTGTCC       | TGTATCAGTTGAGAAACATTGAACG  | [33] |
| Arabidopsis thaliana | AT5G57050 | TGTCTCAACGATTCTAGATTCC     | TCACGACAATAATTGCTACCTGAG   | [33] |
| Arabidopsis thaliana | AT5G59220 | GTTCCCATGTAGCGATGAAATGTAG  | AAGCTACGCGCCATTGAC         | [33] |

|                      |           |                             |                            |      |
|----------------------|-----------|-----------------------------|----------------------------|------|
| Arabidopsis thaliana | AT5G66400 | GGCTTGGGAGGAATGCTT          | CCTCCTCCCTCCTTGTCC         | [33] |
| Arabidopsis thaliana | AT1G13320 | GACCGGAGCCAACTAGGAC         | AAAACCTGGTAACTTTCCAGCA     | [33] |
| Arabidopsis thaliana | AT5G09810 | GTGGTCGTACAACCGGTATT        | AAGGATAGCATGAGGAAGAGCA     | [33] |
| Arabidopsis thaliana | AT1G13440 | ATCAAGAAGGCCATCAAGGA        | CCTCAGTGTATCCCAAATTCC      | [33] |
| Arabidopsis thaliana | AT2G14610 | GGAGCTACGCAGAACAATAAGA      | CCCACGAGGATCATAGTTGCAACTGA | [34] |
| Arabidopsis thaliana | AT1G75040 | CGGTACAAGTGAAGGTGCTCGTT     | GCCTCGTAGATGGTTACAATGTCA   | [34] |
| Arabidopsis thaliana | AT1G74710 | GCCGTCTCTGAACTCAAATCTCAA    | GTTACGAGCAAGAACAACCTTGTT   | [34] |
| Arabidopsis thaliana | AT1G19680 | AGTTTTCGACGGGACAACAGGAGG    | CCCAGTTTTAGATGACGGAGGTCC   | [35] |
| Arabidopsis thaliana | AT3G23900 | AAGGAGAGAAAGACGCTGCGGC      | TCAGATTCCGGTGCGGATTCC      | [35] |
| Arabidopsis thaliana | AT2G07050 | TCTTGGGGGAAAATGTGGCTATCG    | CGACAATGGCACCACATCCTTCC    | [35] |
| Arabidopsis thaliana | AT1G54370 | GCATTGGAGCTTCATCTGACGAGG    | CTCCCCATCTCCATCTCCATCTCC   | [35] |
| Arabidopsis thaliana | AT3G26590 | GTCGTTGCCGGCTTCTCATTCCG     | CCATGATCGTTGCAAGTAAACGCC   | [35] |
| Arabidopsis thaliana | AT1G54920 | TCCAACATCATCCAATGTGTTGGC    | GAGCGTAAAAGCGTCAACTTCGTT   | [35] |
| Arabidopsis thaliana | AT1G75710 | AGCTTCATCAAGCAGTTCGTCAAG    | TCACTGCGTCTCGGCAATCC       | [35] |
| Arabidopsis thaliana | AT5G37020 | AGATGTTTGCTATCGAAGGGTTGTTG  | CCATGGGTCATCACCAGGAGAAG    | [35] |
| Arabidopsis thaliana | AT1G30490 | AGACCTTGGCGGAGTTCCTTTG      | GTTGCGTGAACAGCTACGATACC    | [35] |
| Arabidopsis thaliana | AT4G00150 | ACCAAGACCAGTCAGCGGTAATC     | AGTGTCGTCGTTGTTGTTGTTAAGG  | [35] |
| Arabidopsis thaliana | AT1G08830 | CCAAAGAGAGACGAAGCA          | GCCTTTGTGATCTCAGGA         | [35] |
| Arabidopsis thaliana | AT2G28190 | GCTCCAGAAGATGAGTGCCGTCA     | CCACCCTTTCCGAGGTATCCTT     | [35] |
| Arabidopsis thaliana | AT1G12520 | GATCTCACAACGGAGCAGCCAGCA    | TTCTAGCAATCACTGCGGCGGTCAA  | [35] |
| Arabidopsis thaliana | AT1G01040 | GATCCATTCTAAGCGAAGTTTCAGAG  | GCCCCGAGCAACATAAAGATCCATAG | [35] |
| Arabidopsis thaliana | AT1G48410 | AAGGAGGTCGAGGAGGGTATGG      | CAAATTGCTGAGCCAGAACAGTAGG  | [35] |
| Arabidopsis thaliana | AT1G31280 | CCCCAATAACGCAGTTTTA         | CAAATTCGTTTCAACACACC       | [35] |
| Arabidopsis thaliana | AT3G62980 | GCCTCTCTCTATCTGGCCTCTTGAC   | AGGGCAGCTCTCTGGTCTCGAGTCC  | [35] |
| Arabidopsis thaliana | AT5G41740 | TGTGATGACGAGTGGAGTGTTCGG    | TCCCTCGACGGTGTGAGATTCAAGT  | [35] |
| Arabidopsis thaliana | AT1G50440 | TCGAATTTGCCTTGATGTTGGAGG    | CCATCTATCAGCAGGCACATTGGC   | [35] |
| Arabidopsis thaliana | AT4G33300 | ACAGAAGAAAGCGGTTGCTGATGC    | TCTGCCTTGGGGAACCTCCATGTC   | [35] |
| Arabidopsis thaliana | AT1G11270 | TGGATCAGTTCATTGGCTCACCG     | CCATATCAGTTGGGCAGGACCG     | [35] |
| Arabidopsis thaliana | AT3G43990 | AACCCGATCTCGGAGAAGTT        | TCACGATCCAAAGCACTGGATGG    | [35] |
| Arabidopsis thaliana | AT5G60390 | ATTGGTAACGGTTACGCCCC        | TCTCCTTACCAGAACGCCTGTC     | [35] |
| Arabidopsis thaliana | AT3G62250 | CGGACCAGCAGCGATTGATT        | ACGGAGGACGAGATGAAGCG       | [35] |
| Arabidopsis thaliana | AT5G44340 | CTGTTTCCGTACCCTCAAGC        | AGGGAAACGAAGACAGCAAG       | [35] |
| Arabidopsis thaliana | AT1G28480 | TGATTGTGATTGGACGGAGA        | TAAACCGCCGGTAACTTCAC       | [36] |
| Arabidopsis thaliana | AT1G27730 | AGGCTCTTACATCACCAGATTAG     | TACACTTGTAGCTCAACTTCTCCA   | [36] |
| Arabidopsis thaliana | AT1G10430 | AGACAAGGTTCACTCAATCCGTG     | CATTGAGACCAAACCTTTCAGC     | [36] |
| Arabidopsis thaliana | AT5G59770 | TGTCGCCGTTTGTGAAGTTT        | CCAGCAGAAGCGTAAGCAGA       | [37] |
| Arabidopsis thaliana | AT5G10480 | ACCCAAGCTTGGGCGGAATATCCACT  | AGACTAGTCGGAAAGTGAATACGCG  | [37] |
| Arabidopsis thaliana | AT2G28390 | GTTAGCT                     | AGAA                       |      |
| Arabidopsis thaliana | AT2G28390 | AACTCTATGCAGCATTGATCCACT    | TGATTGCATATCTTTATCGCCATC   | [37] |
| Arabidopsis thaliana | AT4G11130 | TGGCGAGAGATAACCGGAGGTATG    | CTTCTCATCGGATGGTTTGGATTG   | [38] |
| Arabidopsis thaliana | AT3G43920 | GCCTACTTTTCGATACCTCGGAAGA   | GCATACATCACAGCCTCACGATTG   | [38] |
| Arabidopsis thaliana | AT2G13431 | CTTTTACCAGGTGAGCAAAC        | CAAGCTCTTAACGCAAATTCAAG    | [38] |
| Arabidopsis thaliana | AT3G50480 | CTTGTGGTTTGTACTAATGGTGTCTAC | TTGTATCTCACGTGCTACCCTTAC   | [38] |
| Arabidopsis thaliana | AT4G04293 | GACGACTACTTCACCCAACGTG      | CAGAATCTACGCAAGCACTCTAATG  | [38] |
| Arabidopsis thaliana | AT5G25760 | CTGCGACTCAGGGAATCTTCTAA     | TTGTGCCATTGAATTGAACCC      | [38] |
| Arabidopsis thaliana | AT5G35210 | TCAGCCTTACCCGGAAGTAG        | TGCACCAAAGCTTCCCTAGTG      | [38] |
| Arabidopsis thaliana | AT4G00450 | CCGAGGCTGTGAGAACTTATTC      | ATGTTTGCAGAGTCCCTTAC       | [38] |
| Arabidopsis thaliana | AT3G07610 | AAGGGTAGGCCAAAGGGTAAG       | CCAACCATCCGGAAGTAGTC       | [38] |
| Arabidopsis thaliana | AT3G07610 | GAACTTCTATCTGACGCGGTATC     | TTGATGAGGGCAACCTACAG       | [38] |
| Arabidopsis thaliana | AT4G34270 | TTGGCTGAGAGTTGATGGTG        | GGTGCCTCCAGACTGCTAAG       | [39] |
| Arabidopsis thaliana | AT5G43940 | TGGGAAACCCATTTATCACTTCATG   | CAGCAAGTCCAACAGTGCCAAAG    | [39] |
| Arabidopsis thaliana | AT4G39400 | AGCGATTAGCGGAAACAAAA        | AGATGTTGCAGAGCAGAGCA       | [39] |
| Arabidopsis thaliana | AT3G09840 | GTATGCGCGTAGGAGTGTGA        | ACCGAACCTCTAGACTGCT        | [39] |
| Arabidopsis thaliana | AT5G64740 | AAGTGACGGTGTTCGTGATG        | TCAAATCCGGGTCTCTTCTC       | [39] |
| Arabidopsis thaliana | AT5G60920 | GGAACAAGCTTCGTCTCTGG        | ATTTGGAGACGATGGAGGTG       | [39] |
| Arabidopsis thaliana | AT5G06150 | TACTCGAAGTTTCCGTGCCAGTT     | TCTTTGGACCAAGAGCTGGAACCT   | [39] |
| Arabidopsis thaliana | AT4G35620 | AGAGGTTCTCAAGGCAGCTCAAT     | GTGCTGTTCCATTCACTGAAGCCA   | [39] |
| Arabidopsis thaliana | AT4G34160 | TGGGCAATCGTAGCCACTCCATAA    | CACGTAAGGGCATTGCGGACATTT   | [39] |
| Arabidopsis thaliana | AT1G12840 | GGCTGGTTTAGCTGGTGACT        | GGAGAAGTGGCATCAAAGC        | [39] |

|                      |           |                            |                            |      |
|----------------------|-----------|----------------------------|----------------------------|------|
| Arabidopsis thaliana | AT3G19820 | TGACTGCTAGAGTGGAGCCT       | AGCAACAACAGCGAGAGACA       | [39] |
| Arabidopsis thaliana | AT2G06850 | AAGCTTCTGTGGAAGCCAAG       | TTGTTACAGCGTCAAGGTCAC      | [39] |
| Arabidopsis thaliana | AT2G37640 | CAGGGTACCTTGTGCGAAGA       | AGTGATTGGCCGATGAGAAC       | [39] |
| Arabidopsis thaliana | AT2G05520 | CTTCCAAGGCTTTGGTTCTG       | AGCCACGTTGATCAGGTTTC       | [39] |
| Arabidopsis thaliana | AT2G23430 | AGCTACGGAGCCGGAGAATTGTTT   | GTCGACGTTTCAGTGTACCATCT    | [39] |
| Arabidopsis thaliana | AT5G49720 | GTCCAACGGAGCAGAAGAAG       | CGGCAACAAGAGTACCAACA       | [39] |
| Arabidopsis thaliana | AT1G05850 | TGCCCTCTTTGAGCCTCTTG       | GCTGGCTACATGACCCGAGAA      | [39] |
| Arabidopsis thaliana | AT3G16640 | TCGTTGGGTTACTGTGGTCG       | ATAGGGGACGACGACGAAAC       | [39] |
| Arabidopsis thaliana | AT1G21250 | CGGATCCCAAAACCTGTAGA       | GTATACAGGCAACGCCAAG        | [39] |
| Arabidopsis thaliana | AT3G53980 | CCGTCCCCTCGGTTACAAG        | CCCAATGTTATCTCCTTCATCCT    | [40] |
| Arabidopsis thaliana | AT5G13900 | CATCGATGTCAATGATGCTCAA     | TAGAACGAGTCAAGCAAGCAAT     | [40] |
| Arabidopsis thaliana | AT2G18370 | TGATCAATGGTCCATCTTGTCCCTA  | ACAACATGTGTACATTTCGCCTACA  | [40] |
| Arabidopsis thaliana | AT5G05960 | GCTGTGCTCGAGTGAACAGAT      | GGAGCTCCTAGCTGTGGAAGAAAG   | [40] |
| Arabidopsis thaliana | AT2G37870 | CTAAACGCTGTAACATCCGAAACC   | CAAATGCTCATAAGATCATGGAACA  | [40] |
| Arabidopsis thaliana | AT1G04820 | TCGTCTTGTGAGAATGGGCTC      | ATAACATGGCTACGAAAAGATAGAGA | [40] |
|                      |           |                            | AGT                        |      |
| Arabidopsis thaliana | AT2G24210 | CTGGTGGATGGAGACAGGTT       | AGAGGCTCTTGGATTTGTCC       | [41] |
| Arabidopsis thaliana | AT1G14790 | AAGAGCGGTTTCGGGCGTTGA      | AGCCGAAGCCTTTGCTGACTCA     | [41] |
| Arabidopsis thaliana | AT5G09810 | TACAACGAGCTTCGTGTTGC       | TACATGGCAGGGACATTGAA       | [42] |
| Arabidopsis thaliana | AT5G49360 | GGAGCCCTTGTAATAATGCTG      | ATGAAAACGCCATTGCTCTC       | [42] |
| Arabidopsis thaliana | AT2G44990 | ACAGCCCGCAGATTTGTTGA       | CGACCGTCGACTTTGTAATG       | [42] |
| Arabidopsis thaliana | AT2G04750 | GCCAATTCACACAAGTGGAG       | TCACAGTGACACGACCGAAT       | [42] |
| Arabidopsis thaliana | AT1G02940 | TGACCAGAAGAAGCCGAGTT       | AAGACCCCGTCTAGGAAAA        | [42] |
| Arabidopsis thaliana | AT5G25930 | GAGAAGGAGTTTATTGCTGAAGTTG  | AGCTTTGAATCTTCCCTTGAGATAC  | [43] |
| Arabidopsis thaliana | AT4G24160 | GGTCATTTTGTGTTTCATAGACAACC | GAGTTGTTGATCATGAGAGGAGTCT  | [43] |
| Arabidopsis thaliana | AT3G44190 | GACTTCTCCAGCGGTTAATATCAC   | CATTGTGACCAGTAGCAATAACAAG  | [43] |
| Arabidopsis thaliana | AT1G12240 | GACACGAGGTTTCGATCATTATGCTG | GACCGACCTCGAGATCAAATTGC    | [44] |
| Arabidopsis thaliana | AT1G20630 | CGCCATGCCGAAAAATACCC       | CTTGCTGTCTGAATCCCAGGAC     | [44] |
| Arabidopsis thaliana | AT1G27730 | GCTTCTCCGATTCTCCTTT        | TCTTGTCGCAGACGCTACAC       | [44] |
| Arabidopsis thaliana | AT1G52890 | GTTCCACGGTCTTGCGGATAC      | GCTCAACATTACCGGCAAACTAG    | [44] |
| Arabidopsis thaliana | AT1G74970 | TTCTTCGTTTCAGCGACAATG      | AGATACCGTGGCGGTGATAG       | [44] |
| Arabidopsis thaliana | AT2G21580 | GCCAAAGAAGGATAAGGTTCCACCA  | CCTCGCAAGAGACCCATTAATCCTC  | [44] |
| Arabidopsis thaliana | AT2G23170 | CGGTTTGGTCTCAAGGGATTAC     | GTCGGTCCATGTCTTCATCAATGG   | [44] |
| Arabidopsis thaliana | AT2G42740 | CGTTTCGTTCTCCGTCTCTC       | AAAACCTTGGAGGCTCTGGT       | [44] |
| Arabidopsis thaliana | AT3G03780 | TGCCTCCTGGATTCAGCTTGATGAG  | GCCTTGCCTAACTTCAGTTGTACG   | [44] |
| Arabidopsis thaliana | AT3G11020 | TCGAGATGAAGCGGATGCAAATCA   | TGAATGAACCTGGTCCCCATCAGA   | [44] |
| Arabidopsis thaliana | AT3G17465 | GGATCATCGCGGTTAAGTGT       | GCACACCTTGTGCTCTGAAA       | [44] |
| Arabidopsis thaliana | AT3G18740 | GTCCCATGAAGGAATCAACAGCAG   | CATTGTTGCCATTGTAGCGATGAAC  | [44] |
| Arabidopsis thaliana | AT3G18780 | ACCTTGCTGGACGTGACCTTACTGAT | GTTGTCTCGTGGATTCCAGCAGCTT  | [44] |
| Arabidopsis thaliana | AT3G28900 | CCGCATCGTCAAACTCCTGGTG     | CGATCCTCTCCCTAACAGCAACTCC  | [44] |
| Arabidopsis thaliana | AT4G00100 | CATGGGTCTGATGCACAGTC       | TCTTGACCTGAGGGATACCG       | [44] |
| Arabidopsis thaliana | AT4G25490 | GCATGTCTCAACTTCGCTGA       | ATCGTCTCCTCCATGTCCAG       | [44] |
| Arabidopsis thaliana | AT4G33950 | TTTGCCGATTATGCACGATA       | TGGCTAAATGGGTTGGTGT        | [44] |
| Arabidopsis thaliana | AT4G34000 | AACCGTTCTCAACCTGCAAC       | TGGAGTCAGATCAGGTGACAT      | [44] |
| Arabidopsis thaliana | AT4G38620 | TCCCGGCAATAAGCGACCATTG     | TCACCGAGGAAGAAGACGAACTCA   | [44] |
| Arabidopsis thaliana | AT5G02940 | AGAACCTTGGCACGGTATTTGTGG   | GGCAGCCCTTCAAACGATTTTGTG   | [44] |
| Arabidopsis thaliana | AT5G04620 | TGTTTCGACGGTTTGTGTCAATGG   | TGATTACGCGCATCAGAAAAGATGG  | [44] |
| Arabidopsis thaliana | AT5G15960 | ACCAACAAGAATGCCTTCCA       | CCGCATCCGATACACTCTTT       | [44] |
| Arabidopsis thaliana | AT5G52310 | TCACCGGAACCTTCTCATCC       | TGCTCTGTTTTGGCTCCTCT       | [44] |
| Arabidopsis thaliana | AT2G21590 | GATTCTTCTTACTCCTTTGCCTTG   | CGTGCTTGAACCTTTTGATTCC     | [45] |
| Arabidopsis thaliana | AT2G01980 | ATGATGGGACGCGGATTGT        | TGCCAAACGCCAGACCAAT        | [46] |
| Arabidopsis thaliana | AT5G35410 | TTGGTCTTGCGGGGTTATTC       | TTGGTCTTGCGGGGTTATTC       | [46] |
| Arabidopsis thaliana | AT5G24270 | CGGAGGAATCTCTTCGCTG        | CGCTTGGATGGAAGACACC        | [46] |
| Arabidopsis thaliana | AT5G27150 | CTACCTATTACCGCACCAGAACG    | CTCAATGAACGAGTCTTGGTCC     | [46] |
| Arabidopsis thaliana | AT4G10310 | ACGGCGAGAGATGTTCTTAGTTCCAA | CATGTTCTCATTGCTGGGGACAAAT  | [46] |
| Arabidopsis thaliana | AT3G18780 | TGAGCACGCTCTTCTTGCTTTCA    | GGTGGTGGCATCCATCTTGTTACA   | [47] |
| Arabidopsis thaliana | AT1G21100 | CGTCGCAGACAACCTTGTATG      | TGATCTCCACATGTCATCG        | [48] |
| Arabidopsis thaliana | AT1G51680 | CTCCGGTGTCTGGATCAACT       | GAAATCTGGTGTGCTGCTCCTC     | [48] |
| Arabidopsis thaliana | AT2G30490 | GCAAGCTGAATTGTCCACCT       | CACATCCTTGAAGCTGAGCA       | [48] |
| Arabidopsis thaliana | AT4G34050 | CATCATCGACCAATGGAGAA       | TCGATCAAACGCTTGTGGTA       | [48] |

|                      |               |                            |                           |      |
|----------------------|---------------|----------------------------|---------------------------|------|
| Arabidopsis thaliana | AT4G37970     | TCGATCAAACGCTTGTGGTA       | GTTAGGTGGAGTCGGTCACA      | [48] |
| Arabidopsis thaliana | AT4G05320     | AGGACAAAGAGGGTATCCCA       | CAGACGCAAGACCAAGTGAA      | [48] |
| Bombyx mori          | BGIBMGA003866 | AGGACAACATCAGAGACATCACCG   | TGTAACGGACGCCAAAGT        | [49] |
| Bombyx mori          | BGIBMGA000031 | CGAGTGAGCGTCTGAGCG         | TCCAGCACACAATAGCCCT       | [49] |
| Bombyx mori          | BGIBMGA001149 | TTGGCACTTATGGATACGAC       | CCATAGCCCAGTTCATCG        | [49] |
| Bombyx mori          | BGIBMGA014032 | ATTAGTAATCTGGATGATAAGGAG   | GCTGTTGAAAACTAAGGTAAG     | [49] |
| Bombyx mori          | BGIBMGA010917 | TGGCGGTTACTGACT            | AAGGGTGTTCCTTGT           | [49] |
| Bombyx mori          | BGIBMGA007253 | ATTCAGCGTATCAACAGCAGT      | TGGAAGCGAGTGGAAAGAG       | [49] |
| Bombyx mori          | BGIBMGA007255 | ACTCTAATCCGTTATTCTACCC     | GCACTGAAGTTGGCACAT        | [49] |
| Bombyx mori          | BGIBMGA007254 | TTCTTGGTATGGCTCTGTCTCC     | GCTTCCGCTGCTGATTGC        | [49] |
| Bombyx mori          | BGIBMGA003918 | GGGTGGCGAGGGACATAGT        | ACCTGCCGTTATGCCACCT       | [49] |
| Bombyx mori          | BGIBMGA014224 | CCCTGTATTTCCACCCGAT        | AAACGAAACACTTGATTGAGC     | [49] |
| Bombyx mori          | BGIBMGA001235 | ATTCTGGGTCTCAGCAAAT        | CTGGACTCCTCGCATCAC        | [49] |
| Bombyx mori          | BGIBMGA008134 | AGGGCTCGTTTGGT             | GAAGTCCGCGCATT            | [49] |
| Bombyx mori          | BGIBMGA007856 | TGTGCCCTACGGTTACGC         | ATGGAGCCGATTAGAGCC        | [49] |
| Bombyx mori          | BGIBMGA006740 | AAAGTTTATCGTAAGTTTAGCACAGT | CGACTCGCTTCGCTGATA        | [49] |
| Bombyx mori          | BGIBMGA007285 | CTTGGTGGACAGGATGGG         | GGACTATGAAACATTTGCCTTA    | [49] |
| Bombyx mori          | BGIBMGA007286 | ACTTTTATTGTTAATGGATTCCGA   | AAATCATGCTACCGTCCGC       | [49] |
| Bombyx mori          | BGIBMGA002922 | TCCTGGTTCCACTACGGC         | GCGAAATCGTCTGTGAAA        | [49] |
| Bombyx mori          | BGIBMGA003864 | GTCCTGATCCGCTCTCC          | GCAATAACCTCGTAGCAAAGC     | [49] |
| Bombyx mori          | BGIBMGA002581 | TACGCCAATGCATACGGA         | AAACGAAGCCACGAGAAATA      | [49] |
| Bombyx mori          | BGIBMGA010392 | AAAAACTTTCTGTCGCCGTA       | TAGCGTGCCTGCTGTTTC        | [49] |
| Bombyx mori          | BGIBMGA000772 | TCTCTTACGACGGTTACAGC       | TTGGTATTGTAGTTCCCGC       | [49] |
| Bombyx mori          | BGIBMGA013930 | GGAGCACGAAGTCAATAGTCA      | GGCATTGACCAGTTCCGG        | [49] |
| Bombyx mori          | BGIBMGA008815 | CGCTTCTTCGACACCAA          | AACCCATCCCAGACCTTC        | [49] |
| Bombyx mori          | BGIBMGA013971 | ACTTCGGGTTAGGTTTTAGC       | CCCTGTCCACGCAATGTA        | [49] |
| Bombyx mori          | BGIBMGA011646 | GCTCACACTCTACCACGGGAC      | TGACCACAGCCTCTCCGC        | [49] |
| Bombyx mori          | BGIBMGA004221 | CCATTCACTTTAGGAGCACTTATT   | ATTCGTGGAAGCGTCTGTG       | [49] |
| Bombyx mori          | BGIBMGA007517 | ATGCTGGTCTGAGATTGG         | GGCAAGAACCCTGGCGAAT       | [49] |
| Bombyx mori          | BGIBMGA001609 | CGACTGCCCGAGAAGATT         | TGGACCAGCGGTAAACAC        | [49] |
| Bombyx mori          | BGIBMGA006767 | GCGACAACACTACCGCAAGG       | TTCGCAACGTGTTCCAGGT       | [49] |
| Bombyx mori          | BGIBMGA002964 | AAGAGCCGCATCGTGTGG         | GAGAAGATGCGTTGGAGGC       | [49] |
| Bombyx mori          | BGIBMGA000716 | TGGATTGGGCAAGAAACA         | TGGTCCGCTAATGAAGGA        | [49] |
| Bombyx mori          | BGIBMGA007914 | AAGCTTACATAGCGACTCATT      | TCTTGTGGCGGGATTTA         | [49] |
| Bombyx mori          | BGIBMGA007970 | GCCACCATCATCACAACAAA       | TTCAGCAGGAACTCCACA        | [49] |
| Bombyx mori          | BGIBMGA000251 | CCCCACAAATACGAGGAAAT       | CAGGCTCTGGTCTAAACTCG      | [49] |
| Bombyx mori          | BGIBMGA004074 | ATTATCTGCGTTGCTTTATTGG     | CCGTCCAACCCAATGAGT        | [49] |
| Bombyx mori          | BGIBMGA002770 | TTGTCCCTGCCCTTGTGG         | AAGGCAGGGTCCCTTCTG        | [49] |
| Bombyx mori          | BGIBMGA000371 | ACGTGATCCAGTTGTCCCTA       | GTTGCCATCCCTGTCTTT        | [49] |
| Bombyx mori          | BGIBMGA002384 | TTTTGCTGTCCAGTTGAG         | GTGGTCCGCTGACGAGGTA       | [49] |
| Bombyx mori          | BGIBMGA001959 | ATGAAAGCTCTGGTGGGC         | TCGTCTTGAAGGAAACC         | [49] |
| Bombyx mori          | BGIBMGA000247 | CGGTTATGTTGATGCTGC         | CGACCAAGTTATGGACGA        | [49] |
| Bombyx mori          | BGIBMGA010501 | CTCGGTATGAGTCCGTAGATG      | CTGTAGATCGGCATTGGG        | [49] |
| Bombyx mori          | BGIBMGA011766 | CTTGTTACCCTCGCCACTG        | ACGGCTGGTGTCTGGATT        | [49] |
| Bombyx mori          | BGIBMGA002549 | ATCACCACCAACAGCAAG         | GTCGTCTCGTGGACCTTT        | [49] |
| Bombyx mori          | BGIBMGA003060 | CAGGAAAGCAGACGAGGTG        | CTGGGATTGGAGAAGAGGTT      | [49] |
| Bombyx mori          | BGIBMGA000259 | ACAAGTACCAGCACGAGACC       | AGGTACAACATGGCGAGC        | [49] |
| Bombyx mori          | BGIBMGA000369 | GACAGAAAGCACCCGTAGAA       | GGCGACGAAAGAAACAGAG       | [49] |
| Bombyx mori          | BGIBMGA000345 | TGAAACTGTTCTCTGTG          | TGAGTATGAGCCTCGGACA       | [49] |
| Bombyx mori          | BGIBMGA000325 | ATCATTGCGGCGAGCACTG        | ACCTTGTGGCTGGAACCC        | [49] |
| Bombyx mori          | BGIBMGA011728 | CCGTCTGAGCAACCACCT         | AGCGGAATACGCAATAGG        | [49] |
| Bombyx mori          | BGIBMGA000335 | TCAGAGCCCATCTCCACC         | ACTCGTTTCCGACGTGCT        | [49] |
| Bombyx mori          | BGIBMGA011757 | CCGACAGCCGTATCACAT         | CAAAGCAGGAGCCACAAC        | [49] |
| Bombyx mori          | BGIBMGA011725 | GTTTCAGTTGTTGCTTCAGTGT     | AGTATGTGAGGTGGGTGGA       | [49] |
| Bombyx mori          | BGIBMGA005148 | GCACCCAGTCTACATCCTCAA      | GGTCCTCGCTGATTTGCTT       | [49] |
| Bombyx mori          | BGIBMGA007085 | AAAACGGCTTCCATCCAG         | CGCCATTGTTACCTCCT         | [49] |
| Bombyx mori          | BGIBMGA008212 | GCCAGACACTGCACATCACTC      | CGCTTCTCACGACATCG         | [49] |
| Bombyx mori          | BGIBMGA010500 | AAGCGGAAATCCTCTGTAT        | CTGTTGAGCGACAAATGG        | [49] |
| Bombyx mori          | BGIBMGA013567 | CGGTGTTGTTGGATACATTGAG     | GCTCATCCTGCCATTTCTTACT    | [49] |
| Bombyx mori          | BGIBMGA000667 | CGACAAAGAGTTGAAAATTGAGGA   | CGACAGTGTCATAGCAGAGTACCAT | [50] |



|             |               |                           |                            |      |
|-------------|---------------|---------------------------|----------------------------|------|
| Bombyx mori | BGIBMGA010231 | GTTGAACCCGACGGCACA        | AAGGGAGCGGCTTCATATCTG      | [50] |
| Bombyx mori | BGIBMGA011723 | CGGCTCCAGTGTGGCTTC        | TTTGTTTAGAAGATGTAAGGGGAAGA | [50] |
| Bombyx mori | BGIBMGA002044 | TCAAGCATCTTTAGGGTACGCA    | ACACGACTTGAGCCTCATCATAAA   | [50] |
| Bombyx mori | BGIBMGA002384 | TCTGCTTAGTTTTCCCTGCTGGTAG | CCTTGTCCGTGTCCGATGTAG      | [50] |
| Bombyx mori | BGIBMGA000246 | CTCATGTAGCACCTGTAGCCCAT   | ACATTGATAGATTCCAGCCCTAAGA  | [50] |
| Bombyx mori | BGIBMGA006666 | AAAGTTGAGCGCAATAGGTGGT    | GCGACATACTGATCGGTACAGATAC  | [50] |
| Bombyx mori | BGIBMGA008418 | TCAGGAGGAACCTTACAACCCA    | ATTTGTTTCTTGGGTATCCAGTCTC  | [50] |
| Bombyx mori | BGIBMGA012864 | ACTATTCCTTCCCCTTCG        | ATGGGCACTGGACTGACT         | [51] |
| Bombyx mori | BGIBMGA012865 | GACAGCGTCATCACCCCT        | TCTCTCACAGTTTGCCCG         | [51] |
| Bombyx mori | BGIBMGA011609 | TCAGCGGCAGAATCACATCA      | CGCACGCTATCTTCACTACGC      | [51] |
| Bombyx mori | BGIBMGA001590 | ATTACGACCTCGTTGTGACG      | TTCATGGTCAGAGCGATCCTT      | [51] |
| Bombyx mori | BGIBMGA004735 | TCTCGCTGTAACATCCGTGC      | TGGAAAGTCTCTTACCTCAG       | [51] |
| Bombyx mori | BGIBMGA006623 | CCACAGAGGAGATACACAAGTTCA  | CGTAATGTGCAACCAGCCTT       | [51] |
| Bombyx mori | BGIBMGA014360 | ATGAAGGTGTACGCGTGCTTGT    | TCCGTCTCGAGCGAGAAAAGTC     | [51] |
| Bombyx mori | BGIBMGA010938 | GAAC TTACAGAGTCGGTTTGGTCA | AGCCATAGACCAGACTGAACAAGT   | [51] |
| Bombyx mori | BGIBMGA008824 | CGCATCACGACAACTACGC       | ACGTGGGTGTGGTCAGCAGT       | [51] |
| Bombyx mori | BGIBMGA003696 | GCATTTACCGTGAAAGCC        | AGTATTTACAGGATGGGTTG       | [52] |
| Bombyx mori | BGIBMGA003697 | CGTCTTGTCTCGTTACCCT       | ACGTTCCGTACCATATTGAC       | [52] |
| Bombyx mori | BGIBMGA003698 | AGCAGCAACAAGGAACCAAG      | TCTGAAAACCCATAATGAACTA     | [52] |
| Bombyx mori | BGIBMGA003699 | AAGAAGATAGTGGTGCTGAA      | CAATGGTAATGTCC TTGTGTA     | [52] |
| Bombyx mori | BGIBMGA003496 | GCACCAATAATGGCAACG        | TGTGCAGCTATTTGTCTACT       | [52] |
| Bombyx mori | BGIBMGA003700 | CACCTGCTGATGATATGGCAG     | GCATATTGCTCCTGCTGTTC       | [52] |
| Bombyx mori | BGIBMGA003701 | ATGGAGGGAGATTCCTGTCA      | CCGAAACAATACTTAGGGTC       | [52] |
| Bombyx mori | BGIBMGA003495 | AAGGAAGCCCTGCGAATCTA      | ATAACCGTTGCCGTTTGAGT       | [52] |
| Bombyx mori | BGIBMGA001635 | ACGGCAACTCAGACCCAAGAG     | GACGCCGAGCGATAATGG         | [53] |
| Bombyx mori | BGIBMGA004290 | CGACTGATGAAGTGGCTGAC      | CGAAAGTTGAACCGACCC         | [53] |
| Bombyx mori | BGIBMGA004515 | CAGGCCCTTATATGGTCGAGGC    | CCAAGGTCGGAAGTAGTCG        | [53] |
| Bombyx mori | BGIBMGA004540 | TGTTGTCTGTAATCGCACCC      | TAAGCCTTGTGCGCCGTTG        | [53] |
| Bombyx mori | BGIBMGA004541 | ATTTCAAGGCAGTTTCGTCC      | CTCGTTGGCTTCTTCACTCT       | [53] |
| Bombyx mori | BGIBMGA004605 | CCATTCGTGTTGGGTGAC        | TCAACAAGACGACTGGGC         | [53] |
| Bombyx mori | BGIBMGA004613 | GTCGCCTTGAACCCTAACA       | CAAATCGTTTTCGTCTCACCT      | [53] |
| Bombyx mori | BGIBMGA004614 | TGAGCAACAAAGGAATGGAG      | ACGGTGGGTCCAGTATTTTC       | [53] |
| Bombyx mori | BGIBMGA005780 | TCGGCGATGAATCAAATG        | TTCCCTTCCACCACGAC          | [53] |
| Bombyx mori | BGIBMGA013536 | AAAATCTCACTCAAACAGGCA     | GGGGAACGGTAGTCCATAGC       | [53] |
| Bombyx mori | BGIBMGA014536 | CGCTGGTCTGAATGTGCT        | GCGAGGATTGCTGGTTAT         | [53] |
| Bombyx mori | BGIBMGA014618 | GTCGCCTTGAACCCTAACA       | ACTACCGCATCCCGCACT         | [53] |
| Bombyx mori | BGIBMGA002161 | GAGCAGGAGGAGTCGATGAT      | GAAGAAGCCCGTGTGGAGC        | [53] |
| Bombyx mori | BGIBMGA004521 | TAACGACTGGGAGATGAA        | TCGGCGTGCTTAGGGATA         | [53] |
| Bombyx mori | BGIBMGA007809 | CAACGAGGCTCTTTCTGGT       | CAAGTAGGTGGAGGCAAT         | [53] |
| Bombyx mori | BGIBMGA002239 | CGTCGTGTTTCTGGTGGT        | AGGCTCGCCAGTGTATG          | [53] |
| Bombyx mori | BGIBMGA009120 | CTGGTCCCACCGTCATCT        | CGAGCAAACCTCCTAGCGT        | [53] |
| Bombyx mori | BGIBMGA013346 | TACGCCACCTTCTAATC         | CTTGACCAGACACCTCCA         | [53] |
| Bombyx mori | BGIBMGA000852 | GGATGCTTGAAGTGGGATA       | GGCGGGTCTTTGTGGTAG         | [53] |
| Bombyx mori | BGIBMGA007929 | CGGCTCTCACCAATCTTATG      | CCAGTCGGAGTGCGGG           | [53] |
| Bombyx mori | BGIBMGA012701 | GCGATTGCATAGCCACTT        | CTCCACTCCACCTCCACC         | [53] |
| Bombyx mori | BGIBMGA013945 | CCGTATGCAAAAAGGAAATCA     | TTGGAAGGTAGAGAGGGAGG       | [54] |
| Bombyx mori | BGIBMGA003670 | GTTGTCGTGCTGTTACCAGGA     | GTTGTCGTGCTGTTACCAGGA      | [54] |
| Bombyx mori | BGIBMGA010406 | CGAAGCTAATGAATACCGGTGCG   | CGTGCAGCATACTTGTGCA        | [54] |
| Bombyx mori | BGIBMGA009037 | TCGAGAGACGGCTACGACAAT     | CTGCGAGACGATCAGGAAATC      | [54] |
| Bombyx mori | BGIBMGA010644 | TTTCAATATCGCGTCCGCC       | ACACCGTCGCGGTAATGAAG       | [54] |
| Bombyx mori | BGIBMGA004401 | ACGACAACGACGTTTTGTTCTTC   | CCAGGTGTGCGTTGGCTTAG       | [55] |
| Bombyx mori | BGIBMGA004394 | CTGAATATCTGAAGGAAAAGAAGGG | TTGTCCATAACTGGTAGGCGAAG    | [55] |
| Bombyx mori | BGIBMGA012485 | AATGGAACCTTGATCCCAATG     | CGCTACCCAGATGTACCAAT       | [55] |
| Bombyx mori | BGIBMGA002627 | GGCGTTGCGCGTCTTCAACT      | CCAATCTTCGCTGCATTTATCACTT  | [55] |
| Bombyx mori | BGIBMGA003132 | CAAGCCATCTACGAACTAAGGGAC  | GCACGAAGGAATCTAATCAGGAAT   | [55] |

**Supplementary Table S4. Comparison of specificity and classification of primer pairs collected from literatures and qPrimerDB.**

| Primer class    | <i>Arabidopsis thaliana</i> |           | <i>Bombyx mori</i> |           |    |        |     |        |
|-----------------|-----------------------------|-----------|--------------------|-----------|----|--------|-----|--------|
|                 | Literature                  | qPrimerDB | Literature         | qPrimerDB |    |        |     |        |
| Non-specific    | 133                         | 28.91%    | 111                | 24.13%    | 23 | 20.35% | 2   | 1.77%  |
| Specific        | 327                         | 71.09%    | 349                | 75.87%    | 90 | 79.65% | 111 | 98.23% |
| Specific Level1 | 97                          | 21.09%    | 218                | 47.39%    | 36 | 31.86% | 96  | 84.96% |
| Specific Level2 | 109                         | 23.70%    | 128                | 27.83%    | 37 | 32.74% | 15  | 13.27% |
| Specific Level3 | 121                         | 26.30%    | 3                  | 0.65%     | 17 | 15.04% | 0   | 0.00%  |

All the primers have been listed in the Supplementary Table S3.

**Supplementary Table S5. Comparison of primer pairs derived from MRPrimer and qPrimerDB**

| Primer class    | Mrprimver |        | qPrimerDB |        |
|-----------------|-----------|--------|-----------|--------|
| Non-specific    | 7857      | 35.14% | 4725      | 21.13% |
| Specific        | 14500     | 64.86% | 17632     | 78.87% |
| Specific Level1 | 2937      | 13.14% | 11260     | 50.36% |
| Specific Level2 | 9506      | 42.52% | 6057      | 27.09% |
| Specific Level3 | 2057      | 9.20%  | 315       | 1.41%  |

All the primer pairs were downloaded from MRPrimer and qPrimerDB. For primer pairs in the MRPrimer, only 25444 best primers were kept for comparison with qPrimerDB.

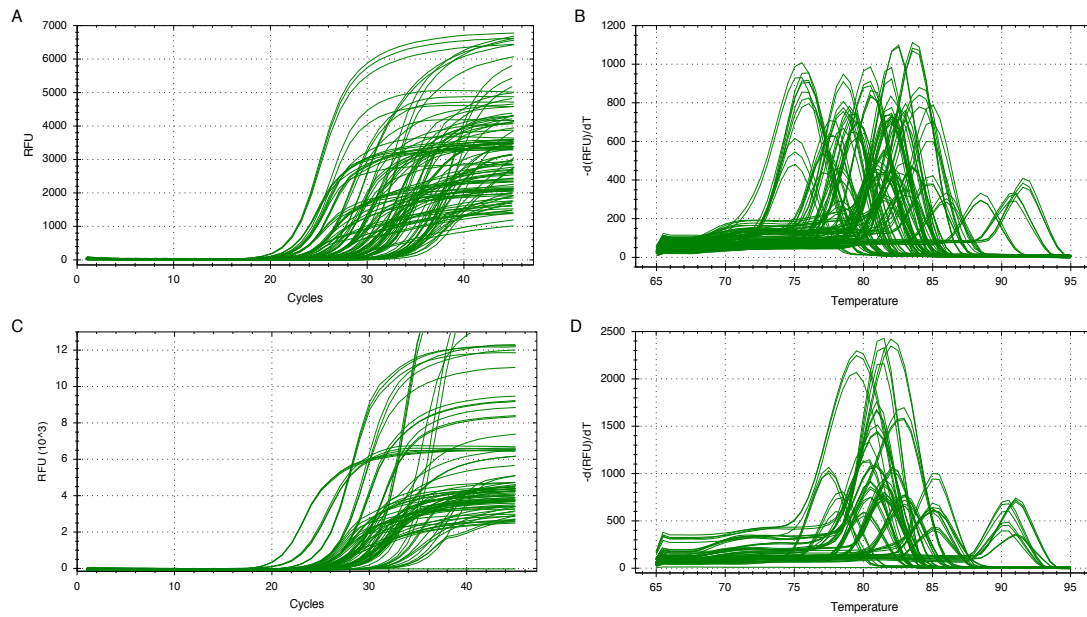

Supplementary Figure S1. qPCR validation of 66 randomly selected genes derived from 6 organisms. The maximal relative fluorescence units (RFU) are 7000 (A) and 13000 (C) on the y-axis of amplification curves of the 66 genes. The maximal relative changes in RFU over time are 1200 (C) and 2500 (D) on the y-axis of melting curves of the 66 genes.

## A qPrimerDB - qPCR Primer Database

A resource for real-time quantitative PCR primers

Version: 1.0

## B Search Arabidopsis thaliana for MYB

Search Arabidopsis thaliana for MYB

| primerID            | GeneID    | pLev | Fprimer                | Rprimer               | PPCY | AmpY | FpT <sub>Y</sub> | RpT <sub>Y</sub> | FpD <sub>Y</sub> | RpD <sub>Y</sub> |
|---------------------|-----------|------|------------------------|-----------------------|------|------|------------------|------------------|------------------|------------------|
| A.thaliana.005296v1 | AT1G66380 | 2    | TTGAGGCAGTGATTGGT...   | GTTCTTGACATCATTAGC... | 100  | 246  | 41.06            | 57.96            | 58.05            | -21.71 -22.18    |
| A.thaliana.000066v1 | AT1G01060 | 2    | CAGGATGATACCGTTCG...   | GCAATGGCAGTTACTT...   | 100  | 194  | 46.39            | 58.06            | 58.02            | -22.21 -22.02    |
| A.thaliana.000038v1 | AT1G01380 | 2    | AGTCGAAGCATCTTAAGA...  | ACCTTCCACCACAAGCT...  | 100  | 141  | 43.26            | 58.05            | 58.05            | -21.87 -21.83    |
| A.thaliana.000054v1 | AT1G01520 | 1    | TAAGCATGGATTAGTCCA...  | TGGTCATTGTCTCTGTAA... | 100  | 141  | 39.72            | 58.01            | 57.99            | -21.96 -21.87    |
| A.thaliana.000530v1 | AT1G06180 | 1    | TCCGCACAACAACATCTAG... | GTTTCTATCTAGTGAGCC... | 100  | 229  | 40.61            | 58.06            | 57.99            | -21.90 -21.87    |
| A.thaliana.000598v1 | AT1G06910 | 2    | CAAAACTTCTCTGGAGTA...  | CATTAGTCTGGCAGCTA...  | 100  | 117  | 44.44            | 58.09            | 58.06            | -22.08 -22.25    |
| A.thaliana.000793v1 | AT1G08810 | 1    | ATGCAGCAAAAAGTTGTAG... | TTTGTACCCAATAAGGCT... | 100  | 121  | 38.02            | 58.09            | 58.06            | -22.06 -21.90    |
| A.thaliana.000870v1 | AT1G09540 | 1    | ACTGAACAAGAGGAGCAT...  | TAGTCGGATAAATCAGAT... | 100  | 186  | 43.55            | 58.01            | 58.05            | -21.96 -21.87    |
| A.thaliana.000890v1 | AT1G09710 | 1    | CCTGTTAAATCGCGTCT...   | CTGATGCAGCAGTCAATA... | 100  | 266  | 46.99            | 57.98            | 58.11            | -22.09 -22.17    |
| A.thaliana.000896v1 | AT1G09770 | 1    | TCGTAAGTCTGCTAAACA...  | CAGGACGTAATTTCTGTG... | 100  | 260  | 43.85            | 58.01            | 58.06            | -21.93 -22.21    |

Go to page: 1 Show rows: 10 1-10 of 248

Export to XLS Export to JSON

## C NCBI-BLAST+ [READ ME]

Version: ncbi-blast-2.6.0+

Database: **Plants**

Animals Other\_eukaryotes **Plants**

**Eudicotyledons**

- Arabidopsis halleri
- Arabidopsis thaliana**
- Beta vulgaris
- Boechera stricta
- Brassica napus
- Capsella grandiflora
- Capsella rubella
- Carica papaya
- Chenopodium quinoa
- Cicer arietinum
- Citrus clementina
- Citrus limon

**Monocotyledons**

- Brachypodium distachyon
- Brachypodium stacei
- Leersia perrieri
- Musa acuminata
- Oropetium thomaeum
- Oryza barthii
- Oryza brachyantha
- Oryza glaberrima
- Oryza indica
- Oryza sativa
- Panicum hallii
- Panicum polyanthemum

**Other\_plants**

- Chlamydomonas reinhardtii
- Cyandioschyzon merolae
- Marchantia polymorpha
- Micromonas
- Micromonas pusilla
- Ostreococcus lucimarinus
- Physcomitrella patens
- Salaginella moellendorffii
- Volvox carteri

Program: blastn Expect: 1e-5 Word size: [Integer; blastn: >=4; others: >=2]

Output Format: Standard **Table** [Best Hit (>=1); Best Match (>=1); ]

Enter sequence below in FASTA format (EXAMPLE SEQUENCE), or enter qPDB identifiers each with a prefix "ID:" (EXAMPLE IDs).

```
>AT2G44080
ATGATTGCGTGGTTCTCCAGCTACAAAACGACATCATAAACATTCAAGAACATTTATTCTCAACAACAACATGGACGTGAGAGGAGATACATACCGGAAAAACAG
AGTTTTCCGGTTTCAGCTCCAGCTCCGATTATGGGAAGGAAGAATTGTTCCGACATTGCTCGCAGAACAGTCCAAGGAGCTAATATACAGCGACTTACTCAGT
TTAGAATCAATGGTTGTGCTTGTGGTCTCACAGCATCTCTGTGATCTACCGTTGATCTTCCACCATTGCTCTCTCTCTTTATGCTGCTTTTGATCTTATGGGA
TTATGTTTTCGTTATGGTCTGCTTTCATGCTCTCTTCTAATCCAAACATGTTCTCTCTTCCACTTTTATGTA
```

or load local sequence file in FASTA format:

## D NCBI-BLAST+ BLASTN Search Arabidopsis\_thaliana.fa

NCBI-BLAST+ BLASTN Search Arabidopsis\_thaliana.fa

| Query(Q)  | Q Length | Q Start | Q End | Subject(S)       | S Length | S Start | S End | Ident | Positiv | Gap | Align Len | Score | E-Value | S Note |
|-----------|----------|---------|-------|------------------|----------|---------|-------|-------|---------|-----|-----------|-------|---------|--------|
| AT2G44080 | 402      | 1       | 389   | <b>AT2G44080</b> | 408      | 1       | 389   | 1     | --      | 0   | 389       | 719   | 0.0     | --     |

Go to page: 1 Show rows: 10 1-1 of 1

Supplementary Figure S2. Screenshots of search and BLAST tools in qPrimerDB. (A) Search input interface. The interface provides an organism selection checklist and keyword input interface. After selecting single or multiple organisms, users can input three types of keywords, as shown in the examples. (B) Search results are displayed in table format. From this interface, users can click the boxes next to the genes of interest and export detailed information about the primers as XLS or JSON files. (C) BLAST analysis interface. This interface is designed to search the database using query sequences in FASTA format against the coding/mRNA sequences of the target organism(s). (D) BLAST results web interface. If the BLAST results are listed in table format, detailed information about the target primer can be displayed via the hyperlink in the Subject column.

## Reference

1. Ye,W., Ren,W., Kong,L., Zhang,W. and Wang,T. (2016) Transcriptomic profiling analysis of *Arabidopsis thaliana* treated with exogenous myo-Inositol. *PLoS One*, **11**, e0161949.
2. Noutoshi,Y., Ikeda,M. and Shirasu,K. (2012) Diuretics prime plant immunity in *Arabidopsis thaliana*. *PLoS One*, **7**, e48443.
3. Bac-Molenaar,J.A., Fradin,E.F., Rienstra,J.A., Vreugdenhil,D. and Keurentjes,J.J.B. (2015) GWA mapping of anthocyanin accumulation reveals balancing selection of MYB90 in *Arabidopsis thaliana*. *PLoS One*, **10**, e0143212.
4. Jung,I.L., Ryu,M., Cho,S.K., Shah,P., Lee,J.H., Bae,H., Kim,I.G. and Yang,S.W. (2015) Cesium toxicity alters microRNA processing and AGO1 expressions in *Arabidopsis thaliana*. *PLoS One*, **10**, e0125514.
5. Li,W., Duan,H., Chen,F., Wang,Z., Huang,X., Deng,X. and Liu,Y. (2014) Identification of quantitative trait loci controlling high calcium response in *Arabidopsis thaliana*. *PLoS One*, **9**, e112511.
6. Cuéllar Pérez,A., Nagels Durand,A., Vanden Bossche,R., De Clercq,R., Persiau,G., Van Wees,S.C.M., Pieterse,C.M.J., Gevaert,K., De Jaeger,G., Goossens,A., *et al.* (2014) The non-JAZ TIFY protein TIFY8 from *Arabidopsis thaliana* is a transcriptional repressor. *PLoS One*, **9**, e84891.
7. Lieberman-Lazarovich,M., Melamed-Bessudo,C., De Pater,S. and Levy,A.A. (2013) Epigenetic alterations at genomic loci modified by gene targeting in *Arabidopsis thaliana*. *PLoS One*, **8**, e85383.
8. Westwood,J.H., Groen,S.C., Du,Z., Murphy,A.M., Anggoro,D.T., Tungadi,T., Luang-In,V., Lewsey,M.G., Rossiter,J.T., Powell,G., *et al.* (2013) A trio of viral proteins tunes aphid-plant interactions in *Arabidopsis thaliana*. *PLoS One*, **8**, e83066.
9. Han,Y., Zhang,X., Wang,Y. and Ming,F. (2013) The suppression of WRKY44 by GIGANTEA-miR172 pathway is involved in drought response of *Arabidopsis thaliana*. *PLoS One*, **8**, e73541.
10. Shen,J., Xing,T., Yuan,H., Liu,Z., Jin,Z., Zhang,L. and Pei,Y. (2013) Hydrogen sulfide improves drought tolerance in *Arabidopsis thaliana* by microRNA expressions. *PLoS One*, **8**, e77047.
11. Armenta-Medina,A., Huanca-Mamani,W., Sanchez-León,N., Rodríguez-Arévalo,I. and Vielle-Calzada,J.P. (2013) Functional analysis of sporophytic transcripts repressed by the female gametophyte in the ovule of *Arabidopsis thaliana*. *PLoS One*, **8**, e76977.
12. Witzel,K., Hanschen,F.S., Schreiner,M., Krumbein,A., Ruppel,S. and Grosch,R. (2013) Verticillium suppression is associated with the glucosinolate composition of *Arabidopsis thaliana* leaves. *PLoS One*, **8**, e71877.
13. Cao,J. (2012) The pectin lyases in *Arabidopsis thaliana*: evolution, selection and expression profiles. *PLoS One*, **7**, e46944.
14. Gallego-Bartolomé,J., Alabadí,D. and Blázquez,M.A. (2011) DELLA-induced early transcriptional changes during etiolated development in *Arabidopsis thaliana*. *PLoS One*, **6**, e23918.
15. Adamo,A., Pinney,J.W., Kunova,A., Westhead,D.R. and Meyer,P. (2008) Heat stress enhances the accumulation of polyadenylated mitochondrial transcripts in *Arabidopsis thaliana*. *PLoS One*, **3**, e2889.

16. Cuéllar Pérez,A., Nagels Durand,A., Vanden Bossche,R., De Clercq,R., Persiau,G., Van Wees,S.C.M., Pieterse,C.M.J., Gevaert,K., De Jaeger,G., Goossens,A., et al. (2014) The non-JAZ TIFY protein TIFY8 from *Arabidopsis thaliana* is a transcriptional repressor. *PLoS One*, **9**, e84891.
17. Banerjee,J., Sahoo,D.K., Dey,N., Houtz,R.L. and Maiti,I.B. (2013) An intergenic region shared by At4g35985 and At4g35987 in *Arabidopsis thaliana* is a tissue specific and stress inducible bidirectional promoter analyzed in transgenic *Arabidopsis* and tobacco plants. *PLoS One*, **8**, e79622.
18. Nie,S. and Xu,H. (2016) Riboflavin-induced disease resistance requires the mitogen-activated protein kinases 3 and 6 in *Arabidopsis thaliana*. *PLoS One*, **11**, e0153175.
19. Koryachko,A., Matthiadis,A., Muhammad,D., Foret,J., Brady,S.M., Ducoste,J.J., Tuck,J., Long,T.A. and Williams,C. (2015) Clustering and Differential Alignment Algorithm: Identification of early stage regulators in the *Arabidopsis thaliana* iron deficiency response. *PLoS One*, **10**, e0136591.
20. Zhao,Y., Xu,T., Shen,C.Y., Xu,G.H., Chen,S.X., Song,L.Z., Li,M.J., Wang,L.L., Zhu,Y., Lv,W.T., et al. (2014) Identification of a retroelement from the resurrection plant *Boea hygrometrica* that confers osmotic and alkaline tolerance in *Arabidopsis thaliana*. *PLoS One*, **9**, e98098.
21. Naznin,H., Kiyohara,D., Kimura,M., Miyazawa,M., Shimizu,M. and Hyakumachi,M. (2014) Systemic resistance induced by volatile organic compounds emitted by plant growth-promoting fungi in *Arabidopsis thaliana*. *PLoS One*, **9**, e86882.
22. Markakis,M.N., Boron,A.K., Van Loock,B., Saini,K., Cirera,S., Verbelen,J.-P. and Vissenberg,K. (2013) Characterization of a small auxin-up RNA (SAUR)-like gene involved in *Arabidopsis thaliana* development. *PLoS One*, **8**, e82596.
23. Poupin,M.J., Timmermann,T., Vega,A., Zuñiga,A. and González,B. (2013) Effects of the plant growth-promoting bacterium *Burkholderia phytofirmans* PsJN throughout the life cycle of *Arabidopsis thaliana*. *PLoS One*, **8**, e69435.
24. Leviatan,N., Alkan,N., Leshkowitz,D. and Fluhr,R. (2013) Genome-wide survey of cold stress regulated alternative splicing in *Arabidopsis thaliana* with tiling microarray. *PLoS One*, **8**, e66511.
25. Geiselhardt,S., Yoneya,K., Blenn,B., Drechsler,N., Gershenzon,J., Kunze,R. and Hilker,M. (2013) Egg laying of cabbage white butterfly (*Pieris brassicae*) on *Arabidopsis thaliana* affects subsequent performance of the larvae. *PLoS One*, **8**, e59661.
26. Zhu,W., Miao,Q., Sun,D., Yang,G., Wu,C., Huang,J. and Zheng,C. (2012) The mitochondrial phosphate transporters modulate plant responses to salt stress via affecting ATP and gibberellin metabolism in *Arabidopsis thaliana*. *PLoS One*, **7**, e43530.
27. Dechorgnat,J., Patrit,O., Krapp,A., Fagard,M. and Daniel-Vedele,F. (2012) Characterization of the Nrt2.6 gene in *Arabidopsis thaliana*: A link with plant response to biotic and abiotic stress. *PLoS One*, **7**, e42491.
28. Martínez-Silva,A.V., Aguirre-Martínez,C., Flores-Tinoco,C.E., Alejandri-Ramírez,N.D. and Dinkova,T.D. (2012) Translation initiation factor ateiF(iso)4E is involved in selective mRNA translation in *Arabidopsis thaliana* seedlings. *PLoS One*, **7**, e31606.
29. Floerl,S., Majcherczyk,A., Possienke,M., Feussner,K., Tappe,H., Gatz,C., Feussner,I., Kues,U. and Polle,A. (2012) *Verticillium longisporum* infection affects the leaf apoplastic



proteome, metabolome, and cell wall properties in *Arabidopsis thaliana*. *PLoS One*, **7**, e31435.

30. 1. Hossain,Z., Amyot,L., McGarvey,B., Gruber,M., Jung,J. and Hannoufa,A. (2012) The translation elongation factor eEF-1B $\beta$ 1 is involved in cell wall biosynthesis and plant development in *Arabidopsis thaliana*. *PLoS One*, **7**, e30425.

31. Schwachtje,J., Karojet,S., Thormahlen,I., Bernholz,C., Kunz,S., Brouwer,S., Schwochow,M., Kohl,K. and van Dongen,J.T. (2011) A naturally associated rhizobacterium of *Arabidopsis thaliana* induces a starvation-like transcriptional response while promoting growth. *PLoS One*, **6**, e29382.

32. Méndez-Bravo,A., Calderón-Vázquez,C., Ibarra-Laclette,E., Raya-González,J., Ramírez-Chávez,E., Molina-Torres,J., Guevara-García,A.A., López-Bucio,J. and Herrera-Estrella,L. (2011) Alkamides activate jasmonic acid biosynthesis and signaling pathways and confer resistance to *Botrytis cinerea* in *Arabidopsis thaliana*. *PLoS One*, **6**, e27251.

33. Hu,J., Barlet,X., Deslandes,L., Hirsch,J., Feng,D.X., Somssich,I. and Marco,Y. (2008) Transcriptional responses of *Arabidopsis thaliana* during wilt disease caused by the soil-borne phytopathogenic bacterium, *Ralstonia solanacearum*. *PLoS One*, **3**, e2589.

34. Perchepped,L., Kroj,T., Tronchet,M., Loudet,O. and Roby,D. (2006) Natural variation in partial resistance to *Pseudomonas syringae* is controlled by two major QTLs in *Arabidopsis thaliana*. *PLoS One*, **1**, e123.

35. Zavallo,D., Debat,H.J., Conti,G., Manacorda,C.A., Rodriguez,M.C. and Asurmendi,S. (2015) Differential mRNA accumulation upon early *Arabidopsis thaliana* infection with ORMV and TMV-Cg is associated with distinct endogenous small RNAs level. *PLoS One*, **10**, e0134719.

36. Arnold,M.D., Gruber,C., Flokova,K., Miersch,O., Strnad,M., Novak,O., Wasternack,C. and Hause,B. (2016) The recently identified isoleucine conjugate of cis-12-Oxo-phytodienoic acid is partially active in cis-12-Oxo-Phytodienoic acid-specific gene expression of *Arabidopsis thaliana*. *PLoS One*, **11**, e0162829.

37. Morineau,C., Gissot,L., Bellec,Y., Hematy,K., Tellier,F., Renne,C., Haslam,R., Beaudoin,F., Napier,J. and Faure,J.D. (2016) Dual fatty acid elongase complex interactions in *Arabidopsis*. *PLoS One*, **11**, e0160631.

38. Coustham,V., Vlad,D., Deremetz,A., Gy,I., Cubillos,F.A., Kerdaffrec,E., Loudet,O. and Bouché,N. (2014) SHOOT GROWTH1 maintains *Arabidopsis* epigenomes by regulating IBM1. *PLoS One*, **9**, e84687.

39. Mangeon,A., Pardal,R., Menezes-Salgueiro,A.D., Duarte,G.L., De Seixas,R., Cruz,F.P., Cardeal,V., Magioli,C., Ricachenevsky,F.K., Margis,R., *et al.* (2016) AtGRP3 is implicated in root size and aluminum response pathways in *Arabidopsis*. *PLoS One*, **11**, e0150583.

40. Narukawa,H., Yokoyama,R., Komaki,S., Sugimoto,K. and Nishitani,K. (2015) Stimulation of cell elongation by tetraploidy in hypocotyls of dark-grown *Arabidopsis* seedlings. *PLoS One*, **10**, e0134547.

41. Hunter,L.J., Westwood,J.H., Heath,G., Macaulay,K., Smith,A.G., Macfarlane,S.A., Palukaitis,P. and Carr,J.P. (2013) Regulation of RNA-dependent RNA polymerase 1 and isochorismate synthase gene expression in *Arabidopsis*. *PLoS One*, **8**, e66530.

42. Berdasco,M., Alcázar,R., García-Ortiz,M.V., Ballestar,E., Fernández,A.F., Roldán-Arjona,T., Tiburcio,A.F., Altabella,T., Buisine,N., Quesneville,H., *et al.* (2008) Promoter DNA hypermethylation and gene repression in undifferentiated arabidopsis cells. *PLoS One*, **3**, e3306.
43. Sham,A., Moustafa,K., Al-Shamisi,S., Alyan,S., Iratni,R. and AbuQamar,S. (2017) Microarray analysis of Arabidopsis WRKY33 mutants in response to the necrotrophic fungus *Botrytis cinerea*. *PLoS One*, **12**, e0172343.
44. Yángüez,E., Castro-Sanz,A.B., Fernández-Bautista,N., Oliveros,J.C. and Castellano,M.M. (2013) Analysis of genome-wide changes in the translatoe of Arabidopsis seedlings subjected to heat stress. *PLoS One*, **8**, e71425.
45. Sulmon,C., Gouesbet,G., Ramel,F., Cabello-Hurtado,F., Penno,C., Bechtold,N., Couée,I. and El Amrani,A. (2011) Carbon dynamics, development and stress responses in arabidopsis: Involvement of the APL4 subunit of ADP-glucose pyrophosphorylase (starch synthesis). *PLoS One*, **6**, e26855.
46. Sun,Y., Kong,X., Li,C., Liu,Y. and Ding,Z. (2015) Potassium retention under salt stress is associated with natural variation in salinity tolerance among Arabidopsis accessions. *PLoS One*, **10**, e0124032.
47. Yang,S., Luo,C., Song,Y. and Wang,J. (2016) Two groups of *Thellungiella salsuginea* RAVs exhibit distinct responses and sensitivity to salt and ABA in transgenic Arabidopsis. *PLoS One*, **11**, e0153517.
48. Zhu,L., Shan,H., Chen,S., Jiang,J., Gu,C., Zhou,G., Chen,Y., Song,A. and Chen,F. (2013) The heterologous expression of the Chrysanthemum R2R3-MYB transcription factor CmMYB1 alters lignin composition and represses flavonoid synthesis in *Arabidopsis thaliana*. *PLoS One*, **8**, e65680.
49. Nie,H., Liu,C., Cheng,T., Li,Q., Wu,Y., Zhou,M., Zhang,Y. and Xia,Q. (2014) Transcriptome analysis of integument differentially expressed genes in the pigment mutant (quail) during molting of silkworm, *Bombyx mori*. *PLoS One*, **9**, e94185.
50. He,S., Tong,X., Lu,K., Lu,Y., Luo,J., Yang,W., Chen,M., Han,M.J., Hu,H., Lu,C., *et al.* (2016) Comparative analysis of transcriptomes among *Bombyx mori* strains and sexes reveals the genes regulating melanic morph and the related phenotypes. *PLoS One*, **11**, e0155061.
51. Ma,Z., Li,C., Pan,G., Li,Z., Han,B., Xu,J., Lan,X., Chen,J., Yang,D., Chen,Q., *et al.* (2013) Genome-wide transcriptional response of silkworm (*Bombyx mori*) to infection by the microsporidian *Nosema bombycis*. *PLoS One*, **8**, e84137.
52. Chen,A., Liao,P., Li,Q., Zhao,Q., Yang,W., Zhu,S., Wu,F., He,R., Dong,Z. and Huang,P. (2015) The structural variation is associated with the embryonic lethality of a novel red egg mutant fuyin-lre of silkworm, *Bombyx mori*. *PLoS One*, **10**, e0128211.
53. Nie,H., Liu,C., Zhang,Y., Zhou,M., Huang,X., Peng,L. and Xia,Q. (2014) Transcriptome analysis of neonatal larvae after hyperthermia-induced seizures in the contractile silkworm, *Bombyx mori*. *PLoS One*, **9**, e113214.
54. Kolliopoulou,A., Van Nieuwerburgh,F., Stravopodis,D.J., Deforce,D., Swevers,L. and Smaghe,G. (2015) Transcriptome analysis of *Bombyx mori* larval midgut during persistent and pathogenic cytoplasmic polyhedrosis virus infection. *PLoS One*, **10**, e0121447.

55. Li,J., Qin,S., Yu,H., Zhang,J., Liu,N., Yu,Y., Hou,C. and Li,M. (2016) Comparative transcriptome analysis reveals different silk yields of two silkworm strains. *PLoS One*, **11**, e0155329.
